# Supplementary material for: Evolution of nonstationary hydrological drought characteristics in the UK under warming
Source: Copernicus journal article supplement (doi:10.5194/egusphere-2025-4096), 2025-09-01
Supplement: Supplementary file 1 [file egusphere-2025-4096-supplement-version2.pdf]

# Evolution of nonstationary hydrological drought characteristics in the UK under warming

Srinidhi Jha<sup>1\*</sup>, Lucy J. Barker<sup>1</sup>, Jamie Hannaford<sup>1,2</sup>, Maliko Tanguy<sup>1,3</sup>

<sup>1</sup>UK Centre for Ecology & Hydrology, Maclean Building, Crowmarsh Gifford, Oxfordshire,  
OX108BB, United Kingdom

<sup>2</sup>Irish Climate Analysis and Research UnitS (ICARUS), Maynooth University, Maynooth, Co.  
Kildare, Ireland

<sup>3</sup>European Centre for Medium Range Forecasts (ECMWF), Reading, United Kingdom

\*Correspondence to: Srinidhi Jha (srijha@ceh.ac.uk)

## List of figures:

**Figure S1.** Spatial distribution of drought **a)** duration **b)** severity and **c)** intensity over UK for G2G model and 3°C warming across different seasons using Q80 and Q90 thresholds.

**Figure S2.** Percentage change in mean, median, Q25 and Q75 nonstationary return levels for **a)** 10-year **b)** 100-year, **c)** 500-year return period across different warming levels, seasons and characteristics.

**Figure S3.** Percentage change in mean stationary return levels for **a)** 10-year, **b)** 100-year and **c)** 500-year return period across different warming levels, seasons and characteristics.

**Figure S4.** Difference in percentage change **a)** mean and Q25 nonstationary and stationary return levels at 1.5°C, **b)** median and Q75 nonstationary and stationary return levels at 1.5°C, **c)** mean and Q25 nonstationary and stationary return levels at 2°C, **d)** median and Q75 nonstationary and stationary return levels at 2°C, **e)** mean and Q25 nonstationary and stationary return levels at 3°C, **d)** median and Q75 nonstationary and stationary return levels at 2°C. **e)** mean and Q25 nonstationary and stationary return levels at 3°C, and **f)** median and Q75 nonstationary and stationary return levels at 3°C warming level.

## List of Tables:

**Table S1.** Number and percentage of nonstationary catchments obtained based on the likelihood ratio test.

Total Duration based on Q90 and Q80 for G2G at 3°C

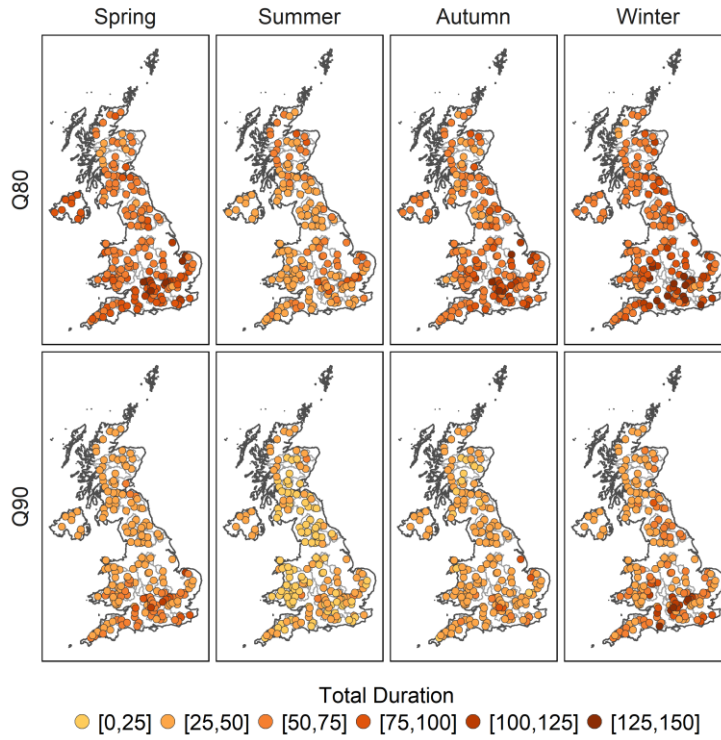

Figure S1a.

Total Severity based on Q90 and Q80 for G2G at 3°C

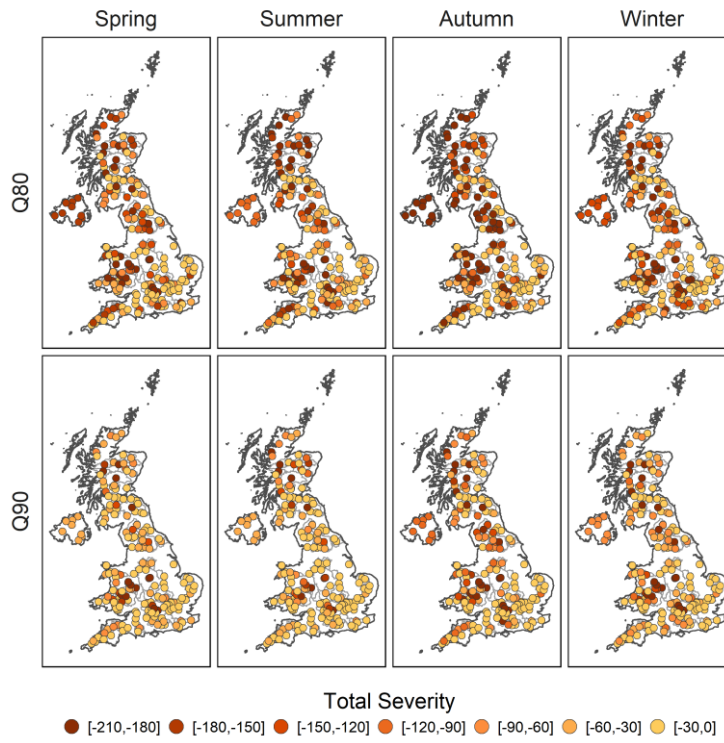

Figure S1b.

Intensity based on Q90 and Q80 for G2G at 3°C

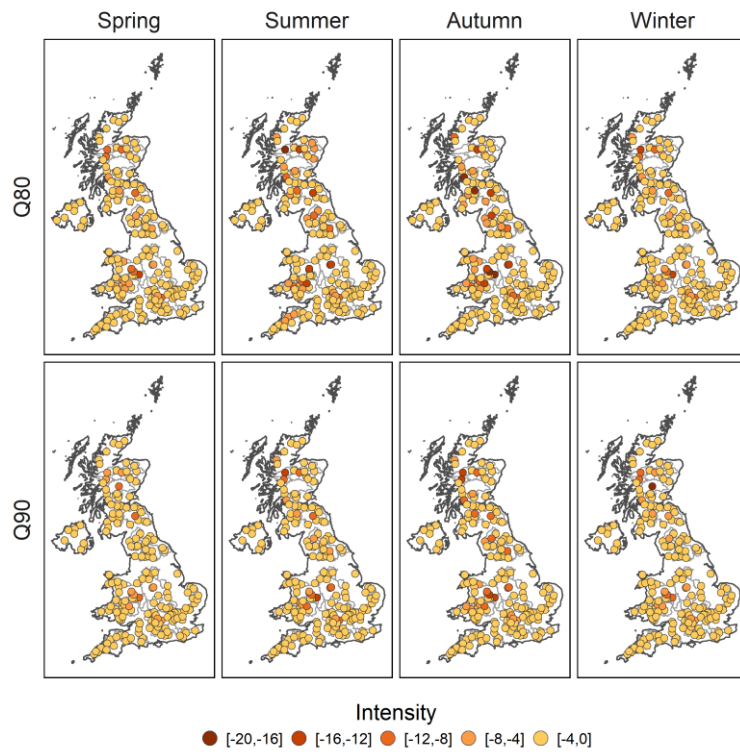

Figure S1c.

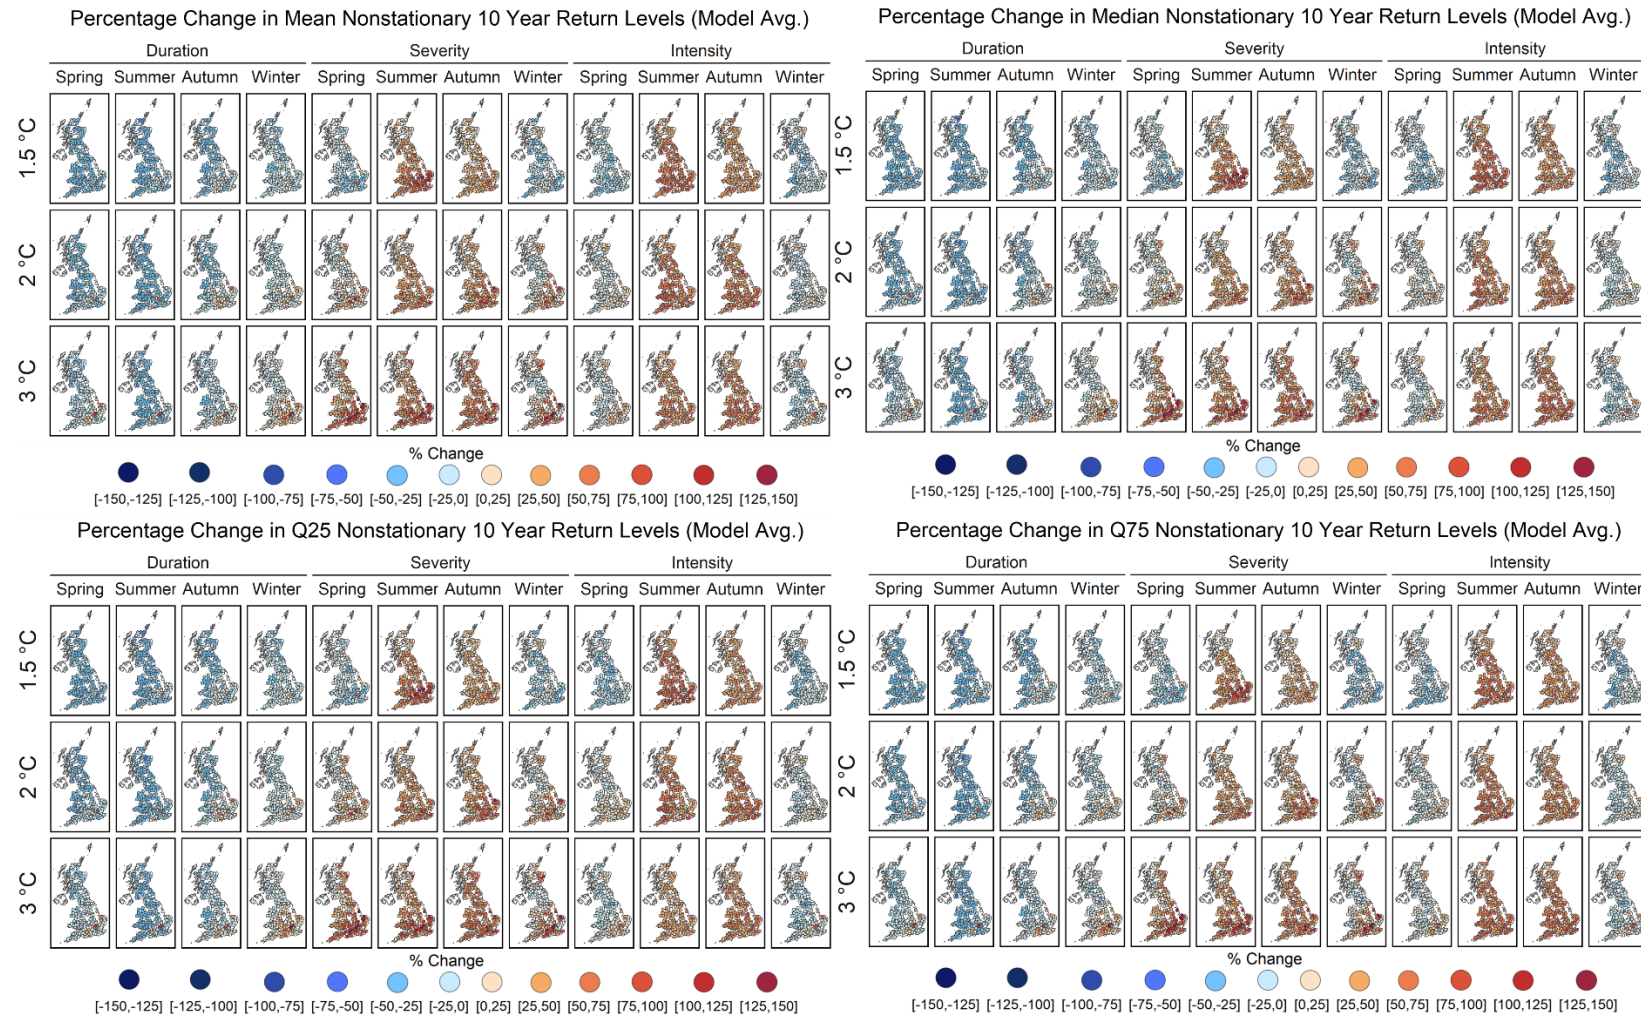

Figure S2a.

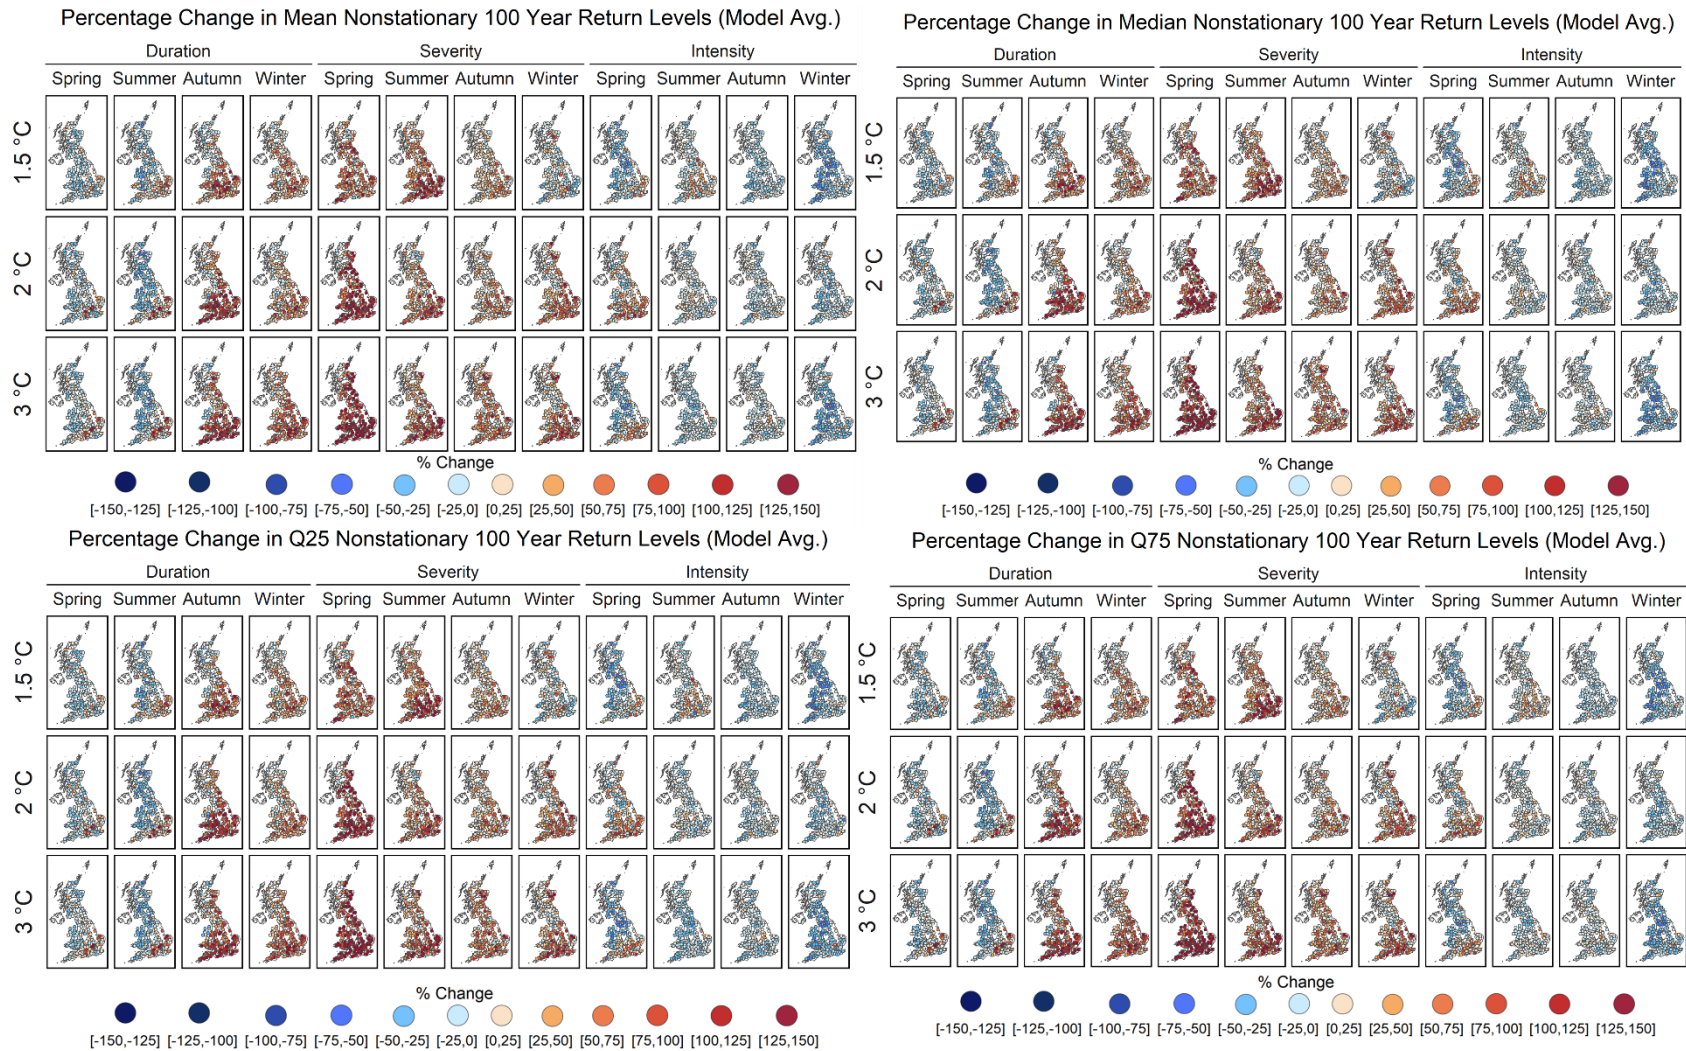

Figure S2b.

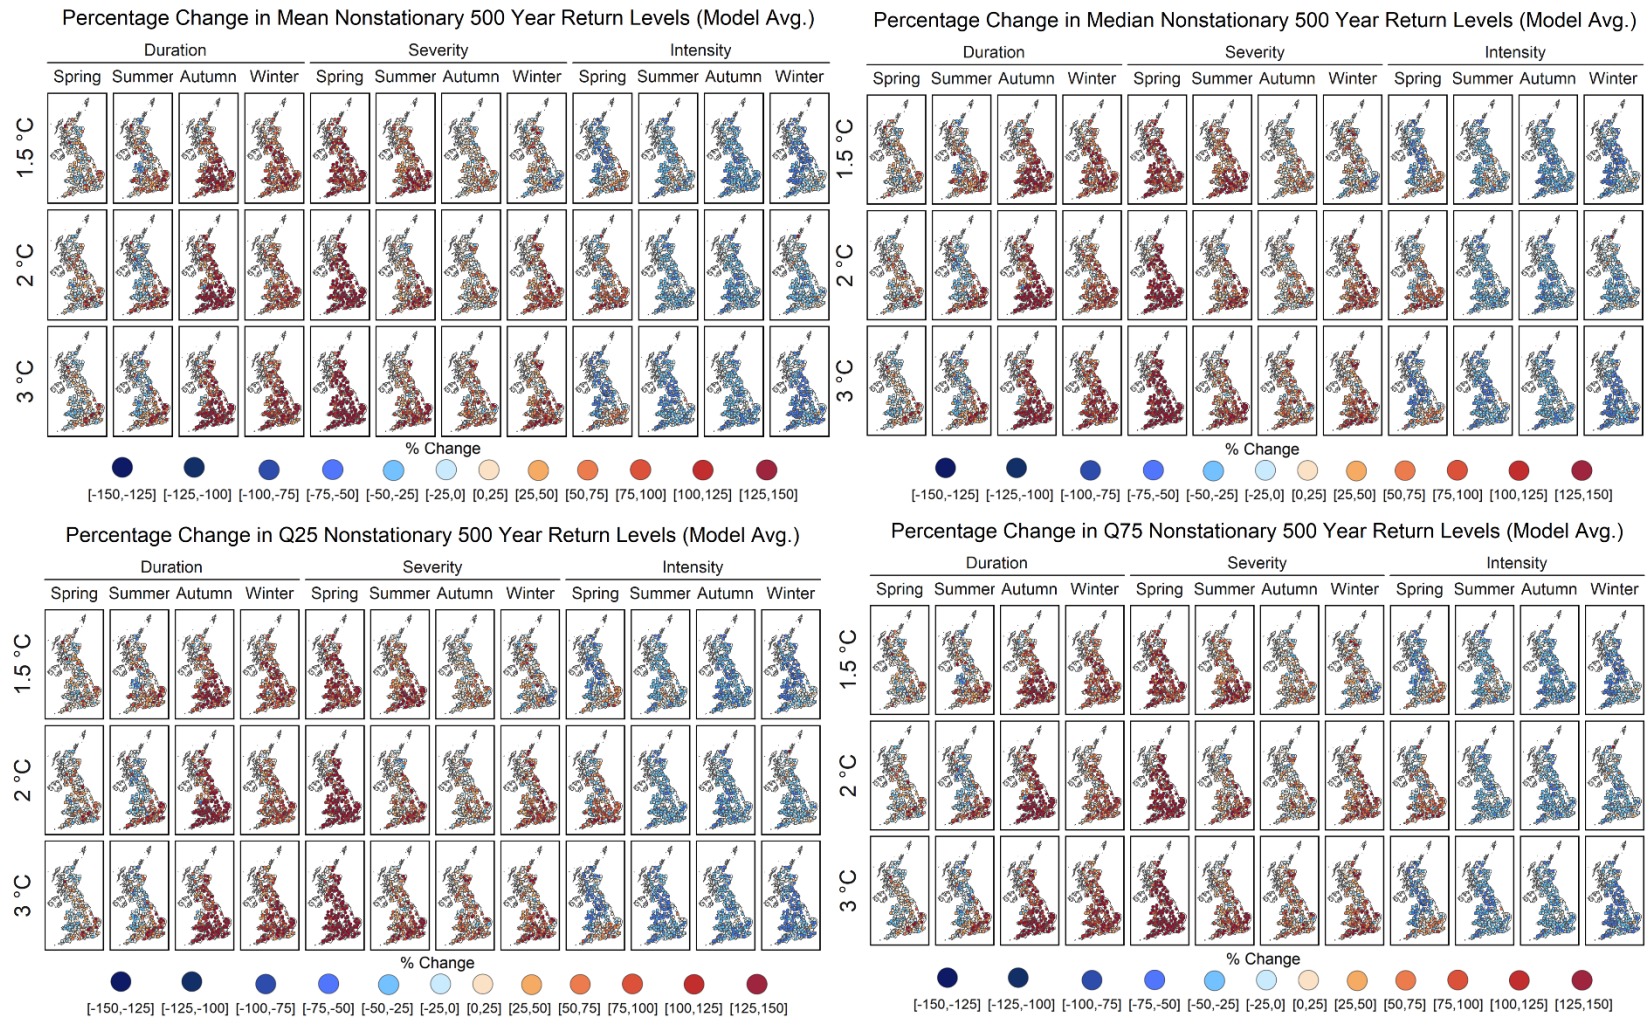

Figure S2c.

# Percentage Change in Mean Stationary 10 Year Return Levels (Model Avg.)

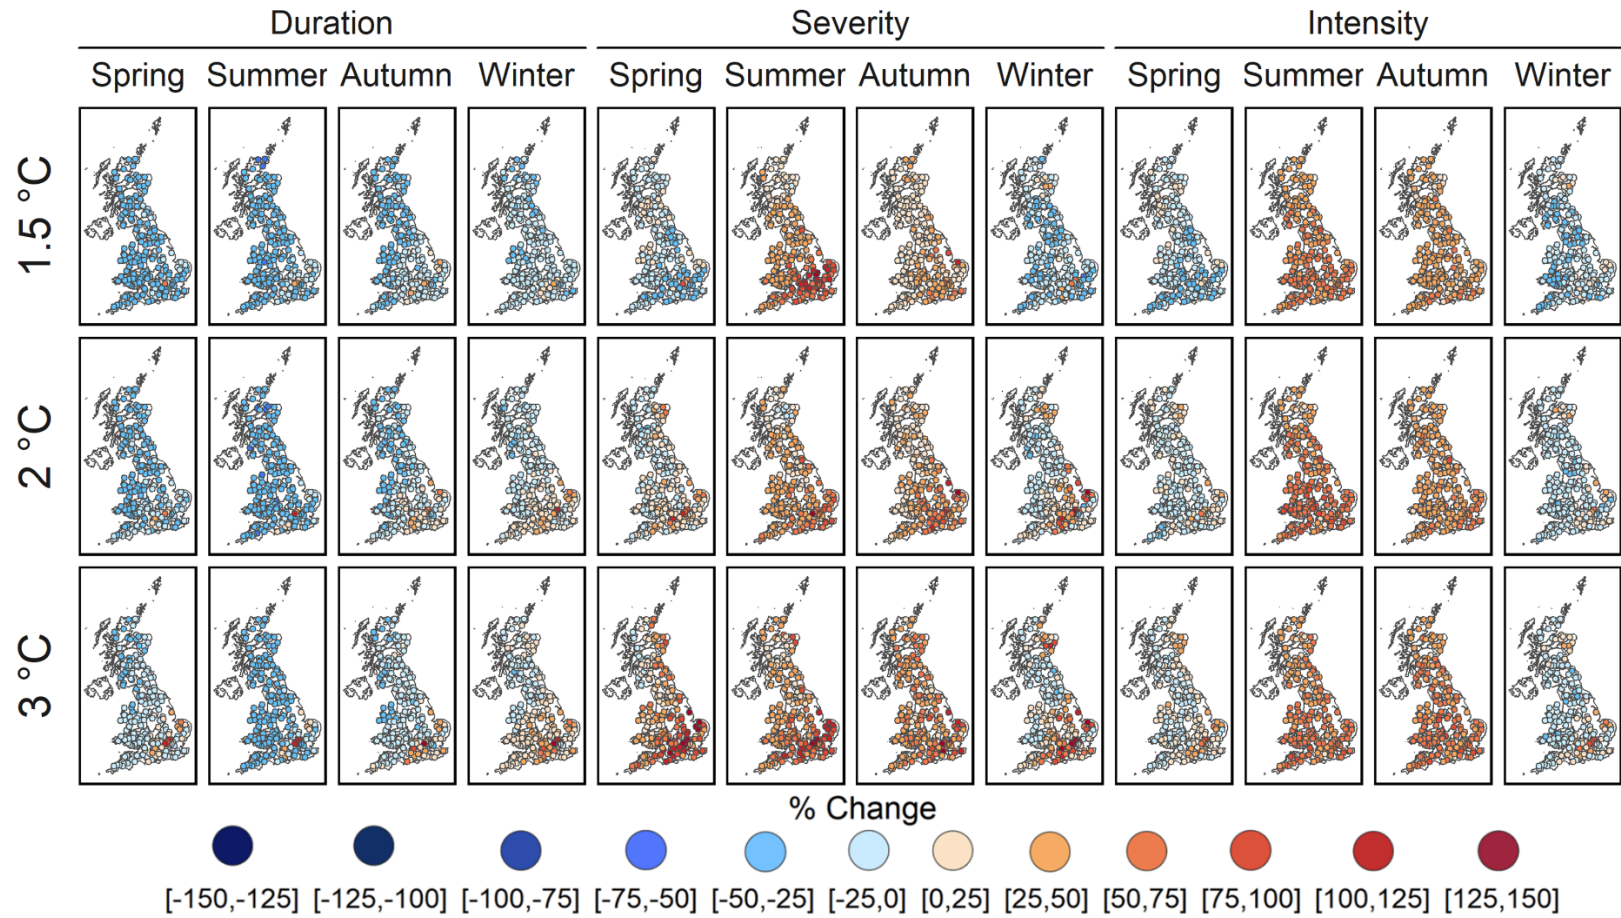

Figure S3a.

# Percentage Change in Mean Stationary 100 Year Return Levels (Model Avg.)

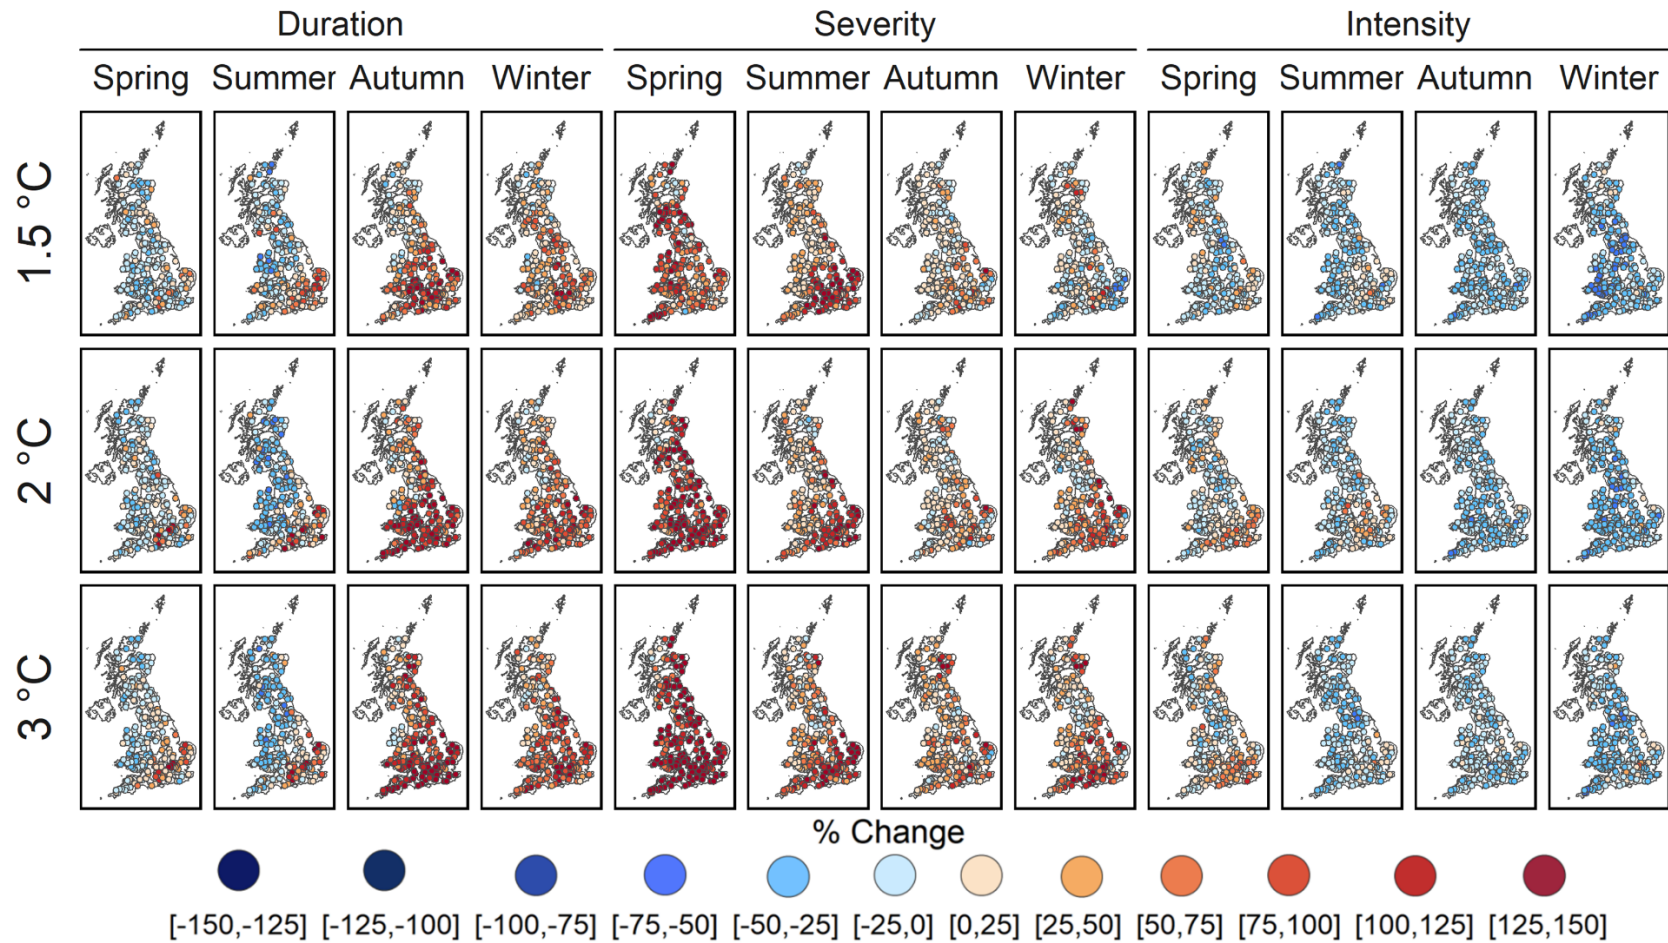

Figure S3b.

# Percentage Change in Mean Stationary 500 Year Return Levels (Model Avg.)

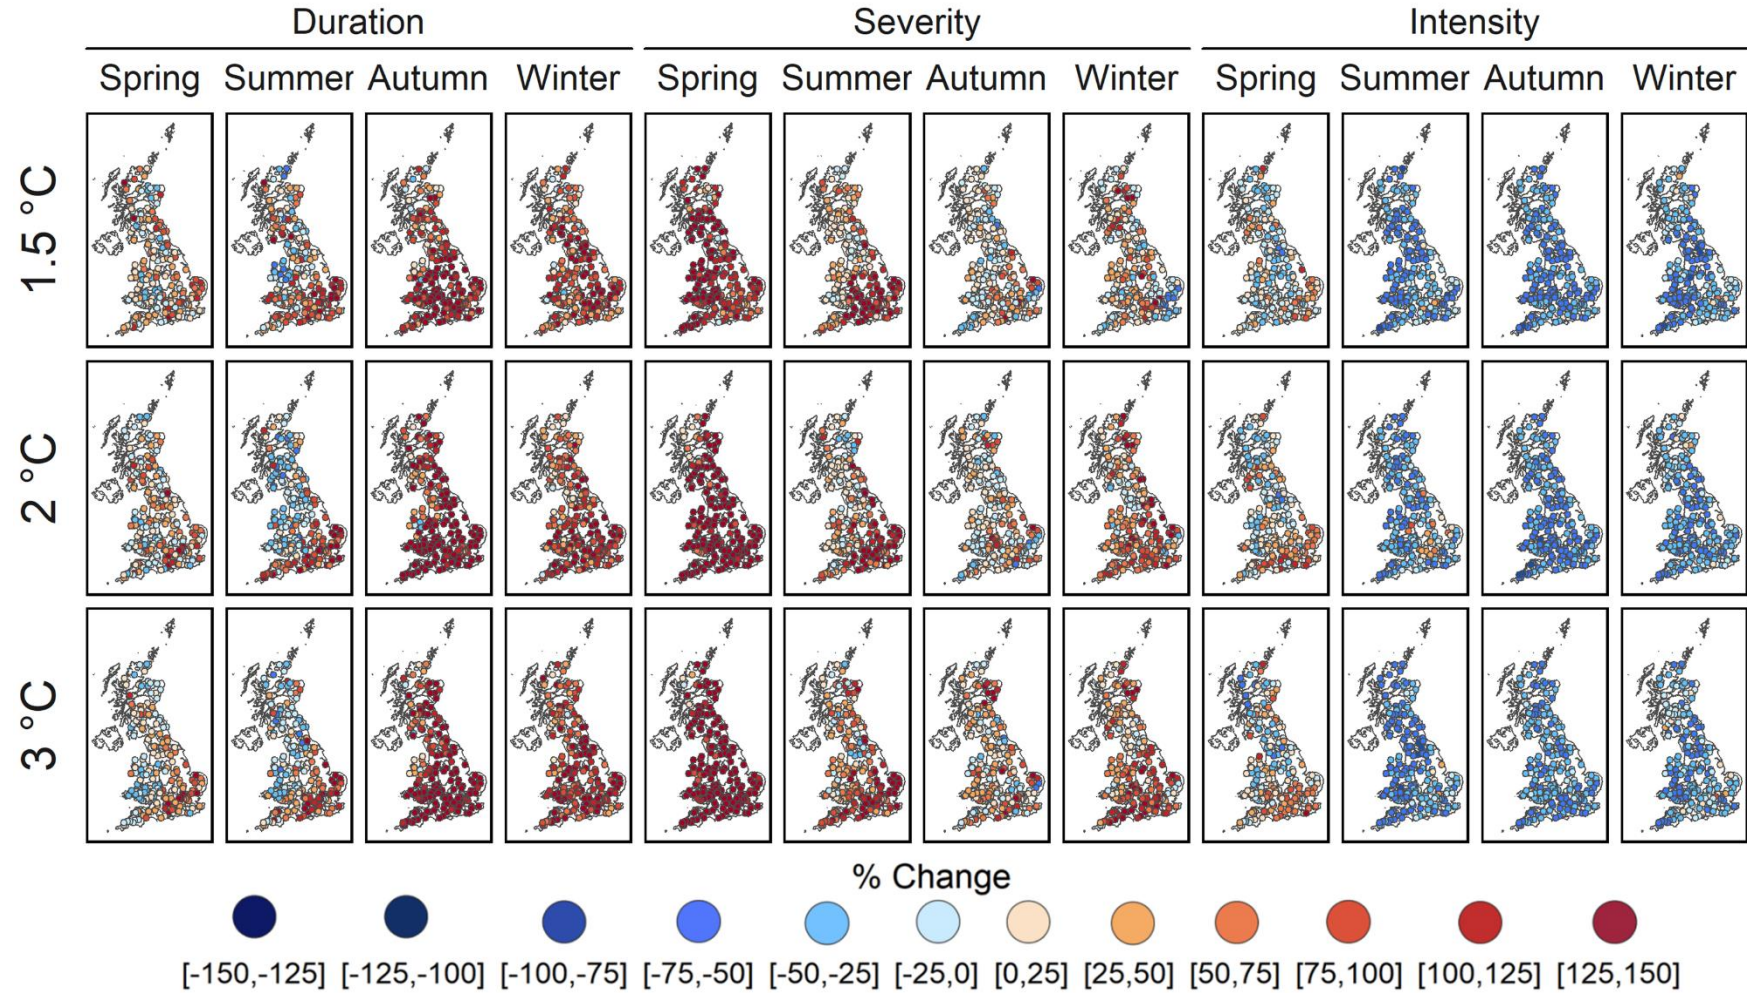

Figure S3c.

Diff. in % Change in Mean Nonstationary vs Stationary Return Levels at 1.5 °C

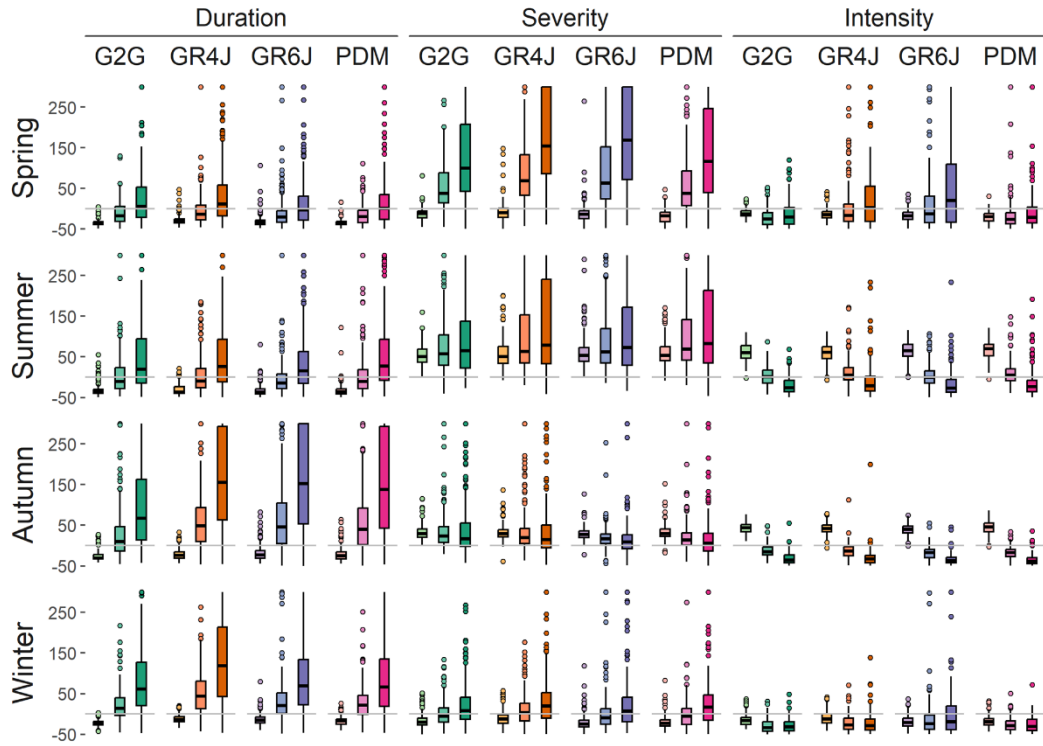

Diff. in % Change in Q25 Nonstationary vs Stationary Return Levels at 1.5 °C

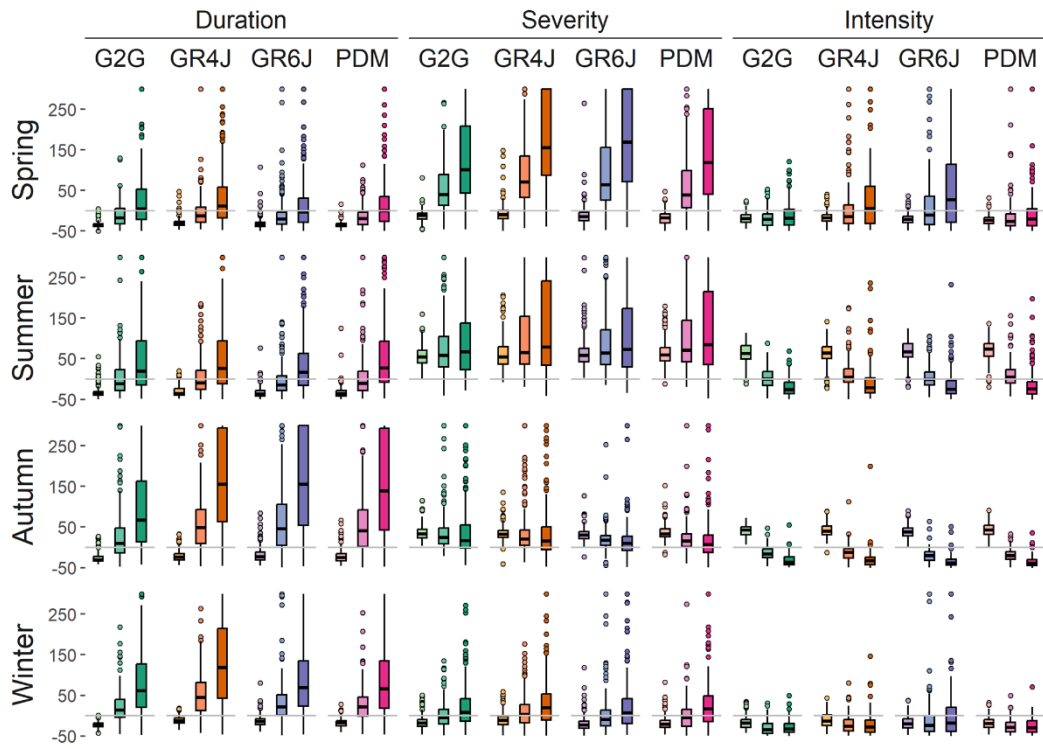

G2G 10YRL   
  GR4J 10YRL   
  GR6J 10YRL   
  PDM 10YRL  
 G2G 100YRL   
  GR4J 100YRL   
  GR6J 100YRL   
  PDM 100YRL  
 G2G 500YRL   
  GR4J 500YRL   
  GR6J 500YRL   
  PDM 500YRL

Figure S4a.

Diff. in % Change in Median Nonstationary vs Stationary Return Levels at 1.5 °C

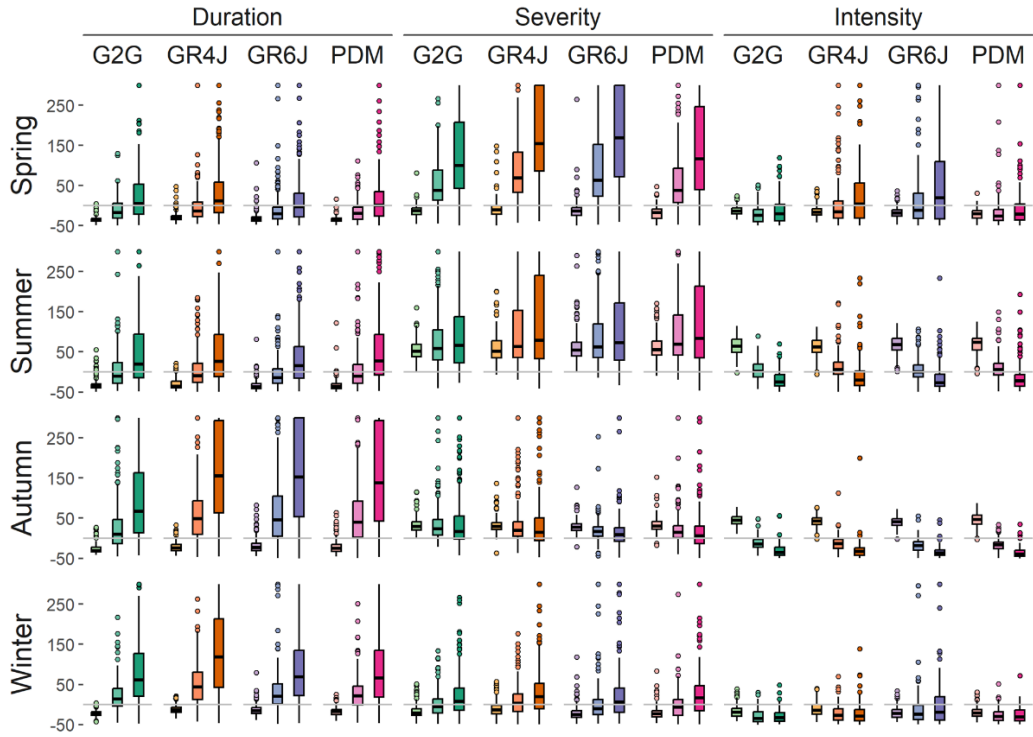

Diff. in % Change in Q75 Nonstationary vs Stationary Return Levels at 1.5 °C

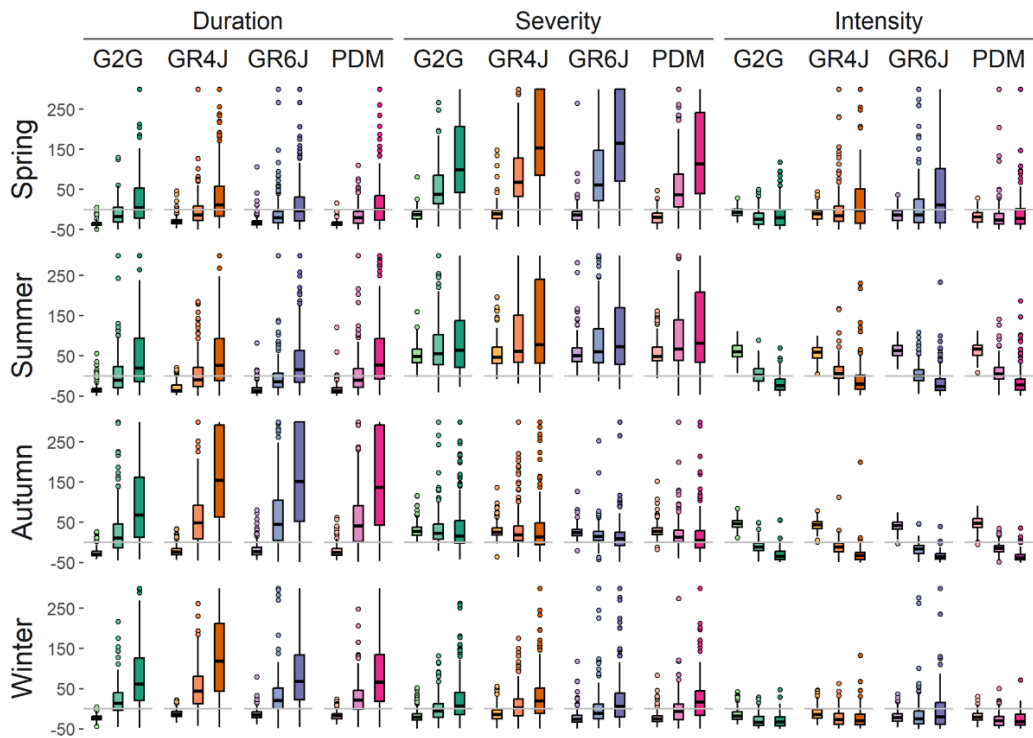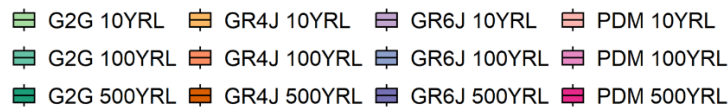

Figure S4b

Diff. in % Change in Mean Nonstationary vs Stationary Return Levels at 2 °C

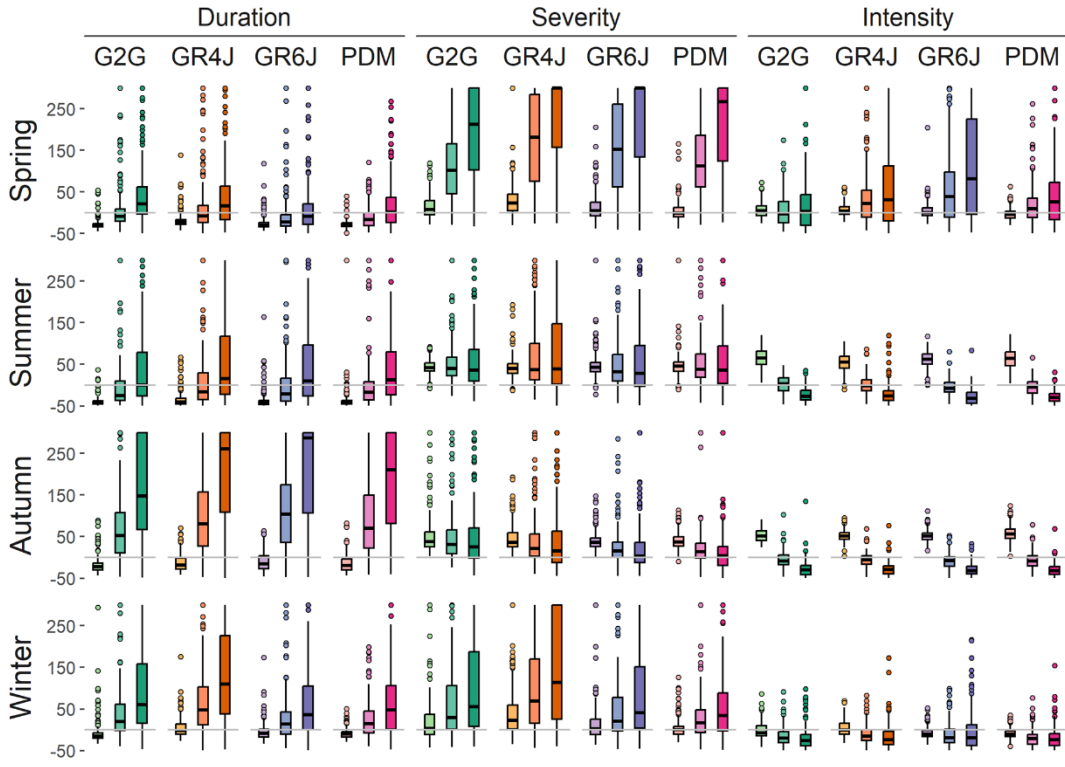

Diff. in % Change in Q25 Nonstationary vs Stationary Return Levels at 2 °C

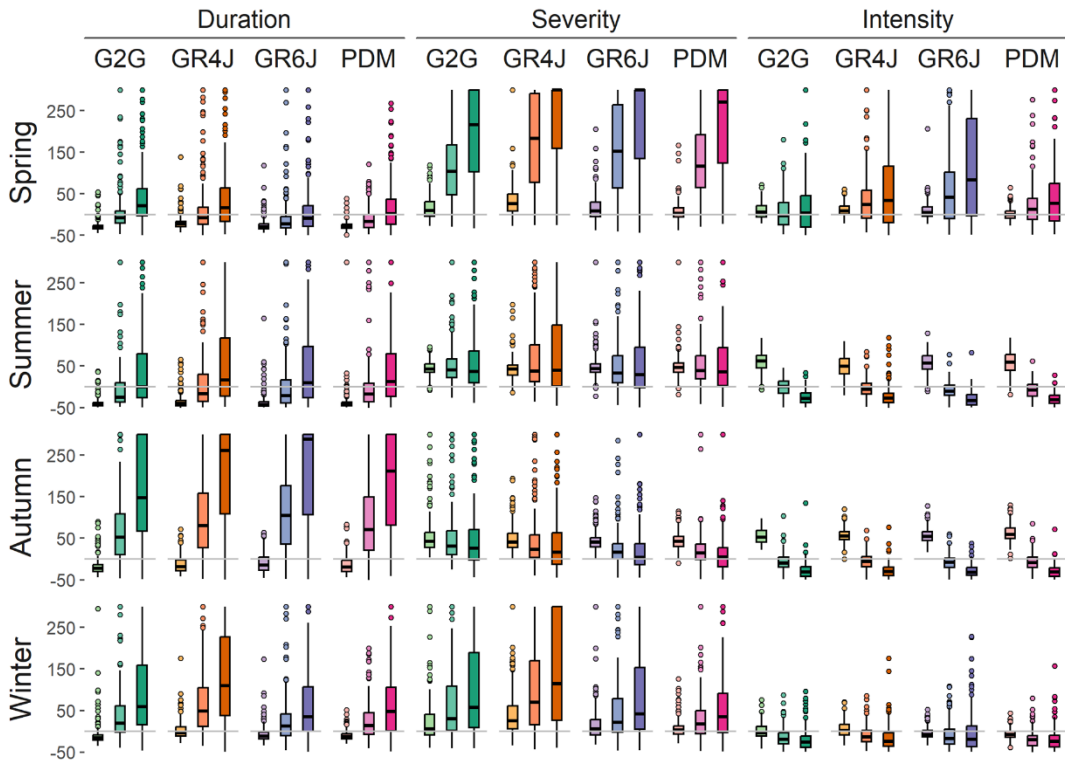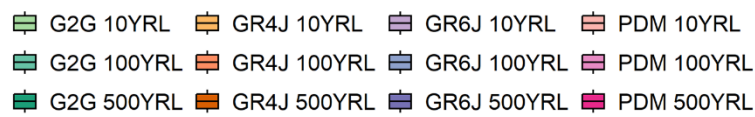

Figure S4c

Diff. in % Change in Median Nonstationary vs Stationary Return Levels at 2 °C

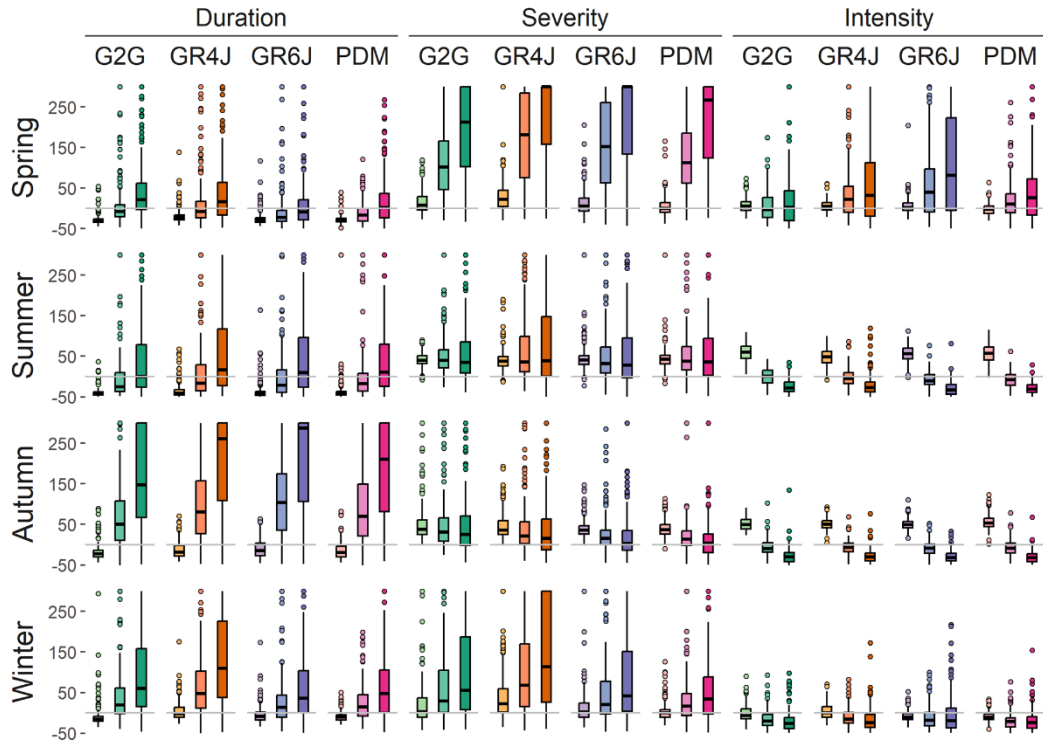

Diff. in % Change in Q75 Nonstationary vs Stationary Return Levels at 2 °C

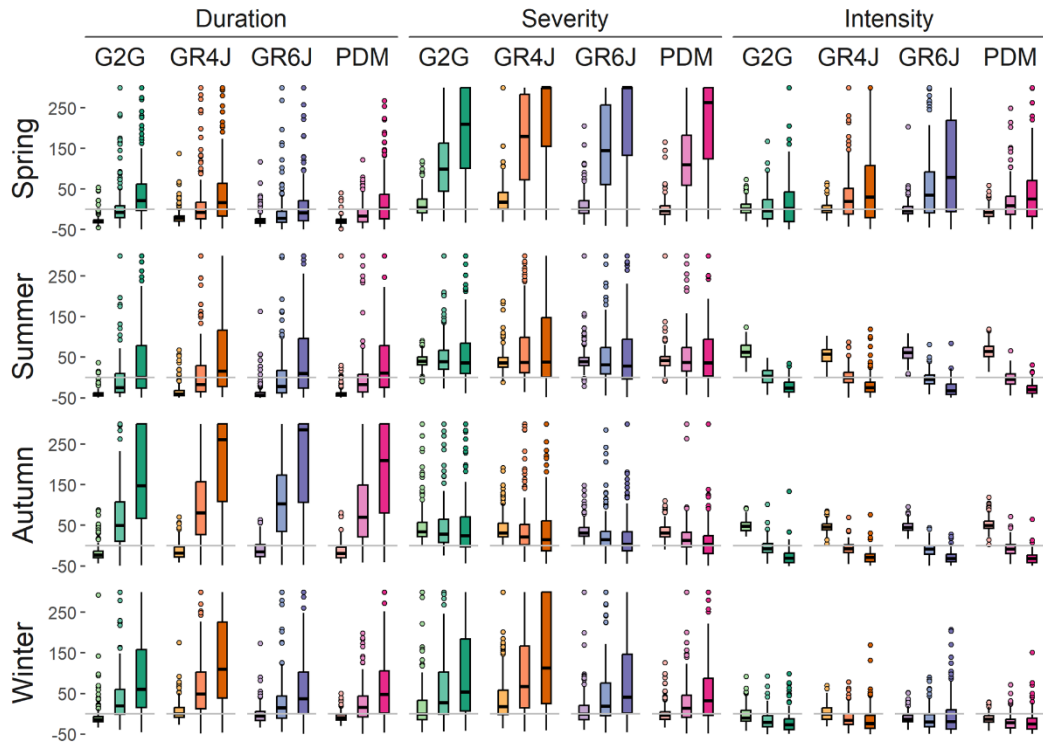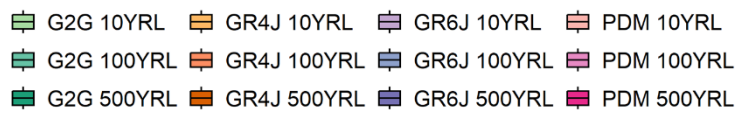

Figure S4d

Diff. in % Change in Mean Nonstationary vs Stationary Return Levels at 3 °C

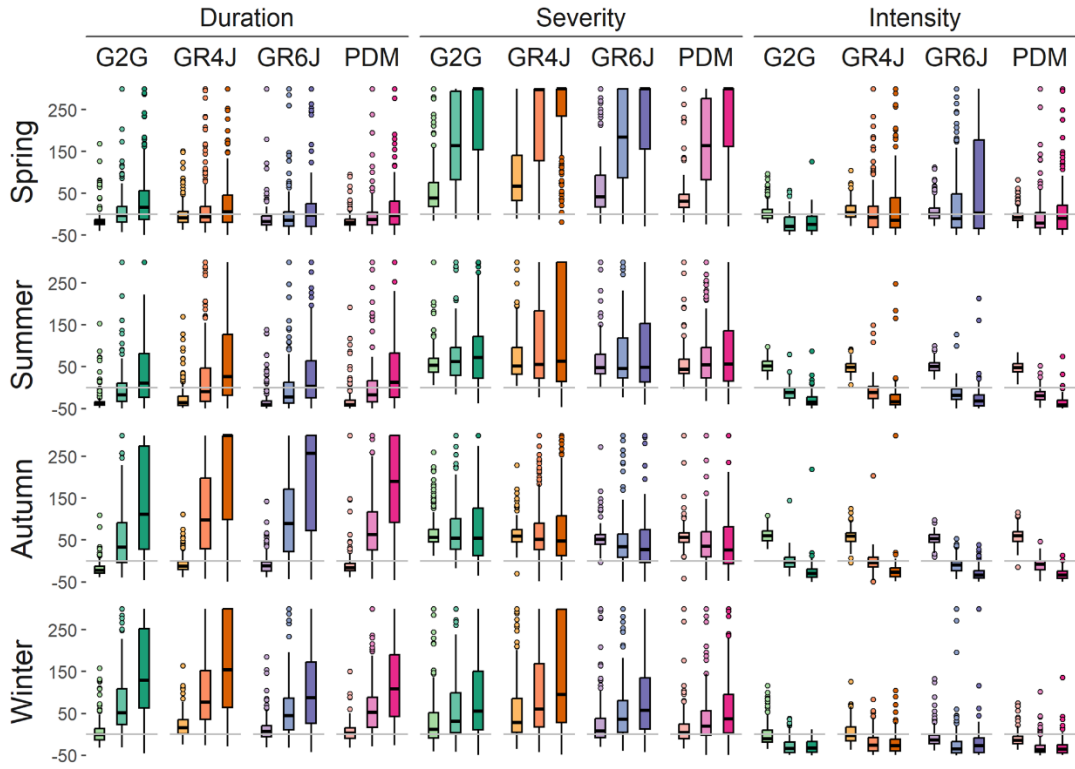

Diff. in % Change in Q25 Nonstationary vs Stationary Return Levels at 3 °C

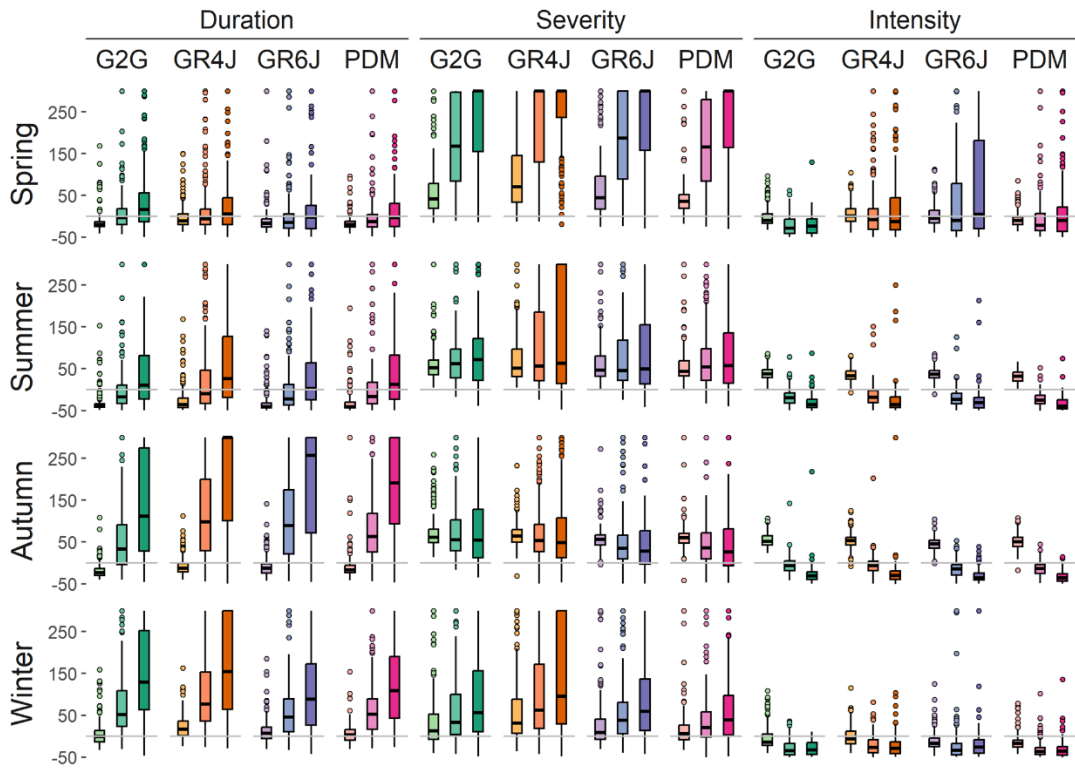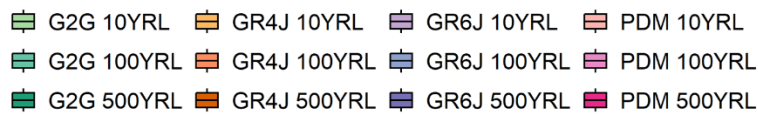

Figure S4e

Diff. in % Change in Median Nonstationary vs Stationary Return Levels at 3 °C

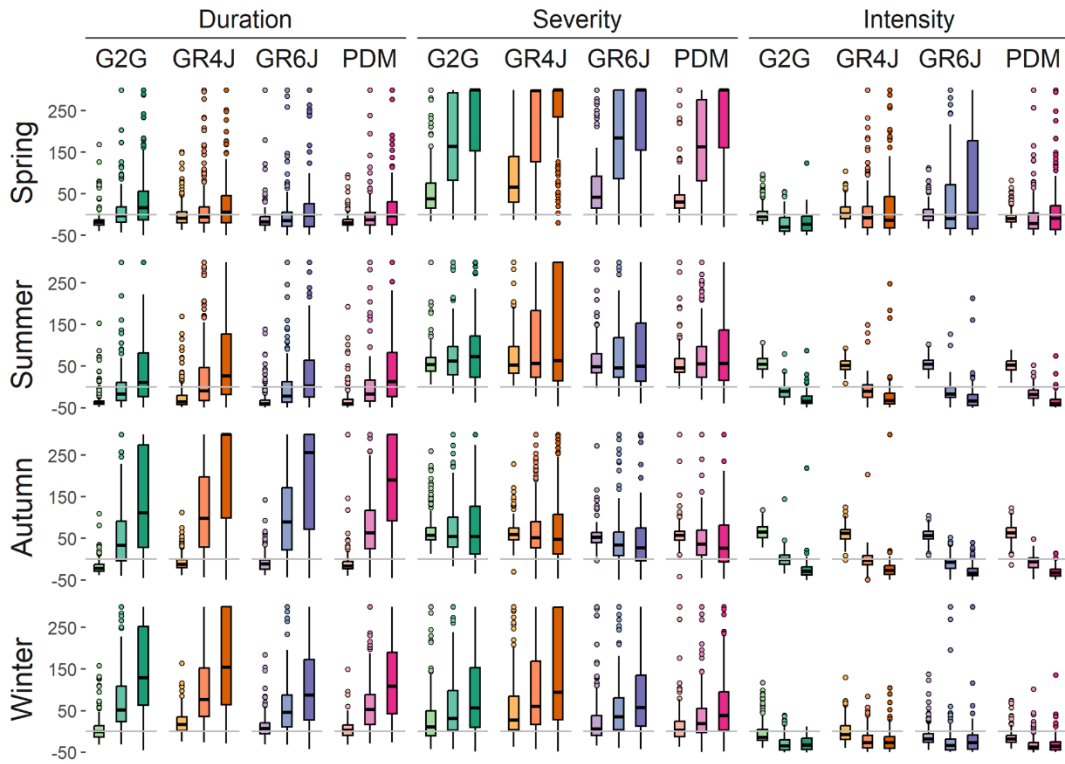

Diff. in % Change in Q75 Nonstationary vs Stationary Return Levels at 3 °C

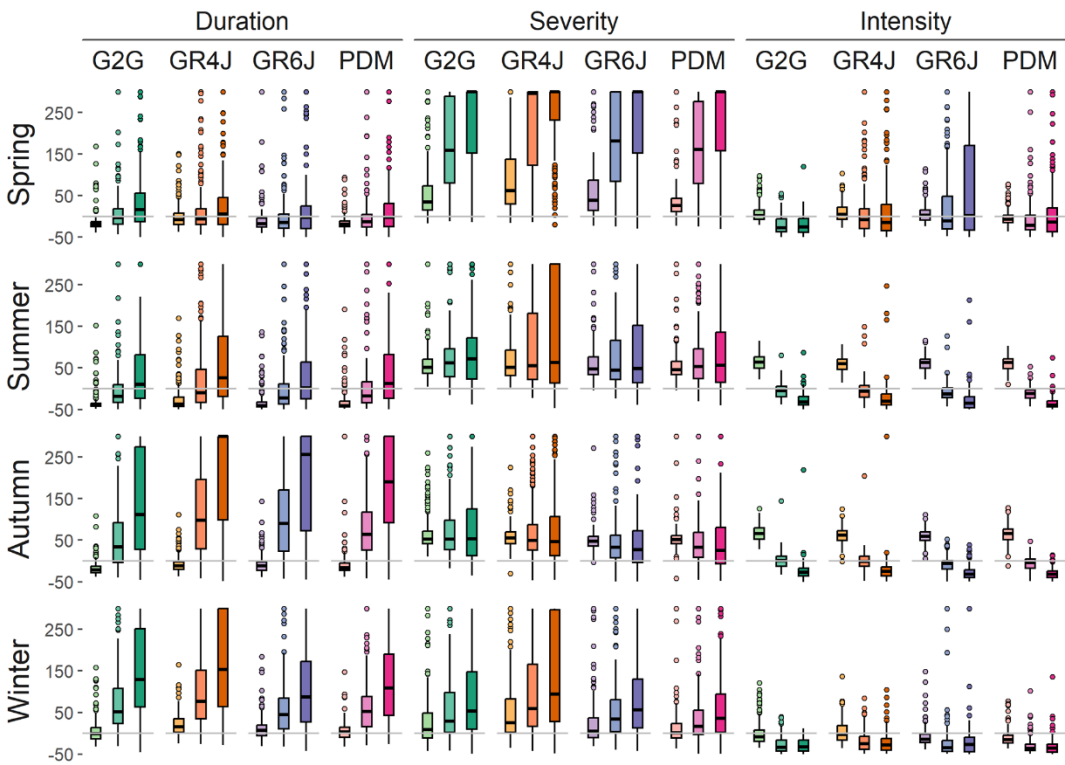

- ▭ G2G 10YRL
- ▭ GR4J 10YRL
- ▭ GR6J 10YRL
- ▭ PDM 10YRL
- ▭ G2G 100YRL
- ▭ GR4J 100YRL
- ▭ GR6J 100YRL
- ▭ PDM 100YRL
- ▭ G2G 500YRL
- ▭ GR4J 500YRL
- ▭ GR6J 500YRL
- ▭ PDM 500YRL

Figure S4f

**Table S1.** Number and percentage of nonstationary catchments obtained based on the likelihood ratio test.

| Season | Metric    | Model | Warming | No of NS catchments | % of NS catchments |
|--------|-----------|-------|---------|---------------------|--------------------|
| Summer | Intensity | G2G   | 1.5     | 14                  | 7                  |
| Summer | Intensity | GR4J  | 1.5     | 20                  | 10                 |
| Summer | Intensity | GR6J  | 1.5     | 36                  | 18                 |
| Summer | Intensity | PDM   | 1.5     | 22                  | 11                 |
| Winter | Intensity | G2G   | 1.5     | 81                  | 40.5               |
| Winter | Intensity | GR4J  | 1.5     | 61                  | 30.5               |
| Winter | Intensity | GR6J  | 1.5     | 65                  | 32.5               |
| Winter | Intensity | PDM   | 1.5     | 62                  | 31                 |
| Autumn | Intensity | G2G   | 1.5     | 52                  | 26                 |
| Autumn | Intensity | GR4J  | 1.5     | 88                  | 44                 |
| Autumn | Intensity | GR6J  | 1.5     | 55                  | 27.5               |
| Autumn | Intensity | PDM   | 1.5     | 57                  | 28.5               |
| Spring | Intensity | G2G   | 1.5     | 73                  | 36.5               |
| Spring | Intensity | GR4J  | 1.5     | 128                 | 64                 |
| Spring | Intensity | GR6J  | 1.5     | 96                  | 48                 |
| Spring | Intensity | PDM   | 1.5     | 117                 | 58.5               |
| Summer | Duration  | G2G   | 1.5     | 191                 | 95.5               |
| Summer | Duration  | GR4J  | 1.5     | 194                 | 97                 |
| Summer | Duration  | GR6J  | 1.5     | 194                 | 97                 |
| Summer | Duration  | PDM   | 1.5     | 192                 | 96                 |
| Winter | Duration  | G2G   | 1.5     | 122                 | 61                 |
| Winter | Duration  | GR4J  | 1.5     | 82                  | 41                 |
| Winter | Duration  | GR6J  | 1.5     | 58                  | 29                 |
| Winter | Duration  | PDM   | 1.5     | 92                  | 46                 |
| Autumn | Duration  | G2G   | 1.5     | 197                 | 98.5               |
| Autumn | Duration  | GR4J  | 1.5     | 192                 | 96                 |
| Autumn | Duration  | GR6J  | 1.5     | 191                 | 95.5               |
| Autumn | Duration  | PDM   | 1.5     | 186                 | 93                 |
| Spring | Duration  | G2G   | 1.5     | 194                 | 97                 |
| Spring | Duration  | GR4J  | 1.5     | 190                 | 95                 |
| Spring | Duration  | GR6J  | 1.5     | 193                 | 96.5               |
| Spring | Duration  | PDM   | 1.5     | 195                 | 97.5               |
| Summer | Severity  | G2G   | 1.5     | 39                  | 19.5               |
| Summer | Severity  | GR4J  | 1.5     | 39                  | 19.5               |
| Summer | Severity  | GR6J  | 1.5     | 33                  | 16.5               |
| Summer | Severity  | PDM   | 1.5     | 29                  | 14.5               |
| Winter | Severity  | G2G   | 1.5     | 180                 | 90                 |
| Winter | Severity  | GR4J  | 1.5     | 154                 | 77                 |
| Winter | Severity  | GR6J  | 1.5     | 157                 | 78.5               |
| Winter | Severity  | PDM   | 1.5     | 162                 | 81                 |
| Autumn | Severity  | G2G   | 1.5     | 147                 | 73.5               |
| Autumn | Severity  | GR4J  | 1.5     | 153                 | 76.5               |
| Autumn | Severity  | GR6J  | 1.5     | 139                 | 69.5               |
| Autumn | Severity  | PDM   | 1.5     | 138                 | 69                 |

|        |           |      |     |     |      |
|--------|-----------|------|-----|-----|------|
| Spring | Severity  | G2G  | 1.5 | 99  | 49.5 |
| Spring | Severity  | GR4J | 1.5 | 144 | 72   |
| Spring | Severity  | GR6J | 1.5 | 120 | 60   |
| Spring | Severity  | PDM  | 1.5 | 133 | 66.5 |
| Summer | Intensity | G2G  | 2   | 8   | 4    |
| Summer | Intensity | GR4J | 2   | 8   | 4    |
| Summer | Intensity | GR6J | 2   | 7   | 3.5  |
| Summer | Intensity | PDM  | 2   | 7   | 3.5  |
| Winter | Intensity | G2G  | 2   | 91  | 45.5 |
| Winter | Intensity | GR4J | 2   | 72  | 36   |
| Winter | Intensity | GR6J | 2   | 78  | 39   |
| Winter | Intensity | PDM  | 2   | 81  | 40.5 |
| Autumn | Intensity | G2G  | 2   | 25  | 12.5 |
| Autumn | Intensity | GR4J | 2   | 38  | 19   |
| Autumn | Intensity | GR6J | 2   | 24  | 12   |
| Autumn | Intensity | PDM  | 2   | 21  | 10.5 |
| Spring | Intensity | G2G  | 2   | 6   | 3    |
| Spring | Intensity | GR4J | 2   | 50  | 25   |
| Spring | Intensity | GR6J | 2   | 54  | 27   |
| Spring | Intensity | PDM  | 2   | 31  | 15.5 |
| Summer | Duration  | G2G  | 2   | 193 | 96.5 |
| Summer | Duration  | GR4J | 2   | 197 | 98.5 |
| Summer | Duration  | GR6J | 2   | 199 | 99.5 |
| Summer | Duration  | PDM  | 2   | 193 | 96.5 |
| Winter | Duration  | G2G  | 2   | 186 | 93   |
| Winter | Duration  | GR4J | 2   | 178 | 89   |
| Winter | Duration  | GR6J | 2   | 174 | 87   |
| Winter | Duration  | PDM  | 2   | 177 | 88.5 |
| Autumn | Duration  | G2G  | 2   | 122 | 61   |
| Autumn | Duration  | GR4J | 2   | 153 | 76.5 |
| Autumn | Duration  | GR6J | 2   | 124 | 62   |
| Autumn | Duration  | PDM  | 2   | 136 | 68   |
| Spring | Duration  | G2G  | 2   | 171 | 85.5 |
| Spring | Duration  | GR4J | 2   | 133 | 66.5 |
| Spring | Duration  | GR6J | 2   | 168 | 84   |
| Spring | Duration  | PDM  | 2   | 165 | 82.5 |
| Summer | Severity  | G2G  | 2   | 18  | 9    |
| Summer | Severity  | GR4J | 2   | 27  | 13.5 |
| Summer | Severity  | GR6J | 2   | 20  | 10   |
| Summer | Severity  | PDM  | 2   | 18  | 9    |
| Winter | Severity  | G2G  | 2   | 150 | 75   |
| Winter | Severity  | GR4J | 2   | 132 | 66   |
| Winter | Severity  | GR6J | 2   | 165 | 82.5 |
| Winter | Severity  | PDM  | 2   | 189 | 94.5 |
| Autumn | Severity  | G2G  | 2   | 119 | 59.5 |
| Autumn | Severity  | GR4J | 2   | 144 | 72   |
| Autumn | Severity  | GR6J | 2   | 104 | 52   |

|        |           |      |   |     |      |
|--------|-----------|------|---|-----|------|
| Autumn | Severity  | PDM  | 2 | 107 | 53.5 |
| Spring | Severity  | G2G  | 2 | 40  | 20   |
| Spring | Severity  | GR4J | 2 | 95  | 47.5 |
| Spring | Severity  | GR6J | 2 | 87  | 43.5 |
| Spring | Severity  | PDM  | 2 | 70  | 35   |
| Summer | Intensity | G2G  | 3 | 160 | 80   |
| Summer | Intensity | GR4J | 3 | 126 | 63   |
| Summer | Intensity | GR6J | 3 | 131 | 65.5 |
| Summer | Intensity | PDM  | 3 | 142 | 71   |
| Winter | Intensity | G2G  | 3 | 137 | 68.5 |
| Winter | Intensity | GR4J | 3 | 137 | 68.5 |
| Winter | Intensity | GR6J | 3 | 130 | 65   |
| Winter | Intensity | PDM  | 3 | 125 | 62.5 |
| Autumn | Intensity | G2G  | 3 | 26  | 13   |
| Autumn | Intensity | GR4J | 3 | 75  | 37.5 |
| Autumn | Intensity | GR6J | 3 | 63  | 31.5 |
| Autumn | Intensity | PDM  | 3 | 83  | 41.5 |
| Spring | Intensity | G2G  | 3 | 53  | 26.5 |
| Spring | Intensity | GR4J | 3 | 108 | 54   |
| Spring | Intensity | GR6J | 3 | 88  | 44   |
| Spring | Intensity | PDM  | 3 | 95  | 47.5 |
| Summer | Duration  | G2G  | 3 | 195 | 97.5 |
| Summer | Duration  | GR4J | 3 | 191 | 95.5 |
| Summer | Duration  | GR6J | 3 | 188 | 94   |
| Summer | Duration  | PDM  | 3 | 197 | 98.5 |
| Winter | Duration  | G2G  | 3 | 198 | 99   |
| Winter | Duration  | GR4J | 3 | 196 | 98   |
| Winter | Duration  | GR6J | 3 | 199 | 99.5 |
| Winter | Duration  | PDM  | 3 | 197 | 98.5 |
| Autumn | Duration  | G2G  | 3 | 196 | 98   |
| Autumn | Duration  | GR4J | 3 | 197 | 98.5 |
| Autumn | Duration  | GR6J | 3 | 196 | 98   |
| Autumn | Duration  | PDM  | 3 | 197 | 98.5 |
| Spring | Duration  | G2G  | 3 | 191 | 95.5 |
| Spring | Duration  | GR4J | 3 | 177 | 88.5 |
| Spring | Duration  | GR6J | 3 | 193 | 96.5 |
| Spring | Duration  | PDM  | 3 | 188 | 94   |
| Summer | Severity  | G2G  | 3 | 191 | 95.5 |
| Summer | Severity  | GR4J | 3 | 190 | 95   |
| Summer | Severity  | GR6J | 3 | 185 | 92.5 |
| Summer | Severity  | PDM  | 3 | 188 | 94   |
| Winter | Severity  | G2G  | 3 | 162 | 81   |
| Winter | Severity  | GR4J | 3 | 149 | 74.5 |
| Winter | Severity  | GR6J | 3 | 169 | 84.5 |
| Winter | Severity  | PDM  | 3 | 168 | 84   |
| Autumn | Severity  | G2G  | 3 | 105 | 52.5 |
| Autumn | Severity  | GR4J | 3 | 129 | 64.5 |

|        |          |      |   |     |      |
|--------|----------|------|---|-----|------|
| Autumn | Severity | GR6J | 3 | 118 | 59   |
| Autumn | Severity | PDM  | 3 | 120 | 60   |
| Spring | Severity | G2G  | 3 | 96  | 48   |
| Spring | Severity | GR4J | 3 | 138 | 69   |
| Spring | Severity | GR6J | 3 | 117 | 58.5 |
| Spring | Severity | PDM  | 3 | 124 | 62   |
