# Supplementary material for: Evolution of nonstationary hydrological drought characteristics in the UK under warming
Source: Copernicus journal article supplement (doi:10.5194/egusphere-2025-4096), 2025-09-01
Supplement: Supplementary file 2 [file egusphere-2025-4096-supplement.pdf]

# Evolution of nonstationary hydrological drought characteristics in the UK under warming

Srinidhi Jha<sup>1\*</sup>, Lucy J. Barker<sup>1</sup>, Jamie Hannaford<sup>1,2</sup>, Maliko Tanguy<sup>1,3</sup>

<sup>1</sup>UK Centre for Ecology & Hydrology, Maclean Building, Crowmarsh Gifford, Oxfordshire,  
OX108BB, United Kingdom

<sup>2</sup>Irish Climate Analysis and Research UnitS (ICARUS), Maynooth University, Maynooth, Co.  
Kildare, Ireland

<sup>3</sup>European Centre for Medium Range Forecasts (ECMWF), Reading, United Kingdom

*\*Correspondence to: Srinidhi Jha (srijha@ceh.ac.uk)*

## List of figures:

**Figure S1.** Posterior distribution of parameters for different drought characteristics for a sample (Dee in Scotland, NRFA ID: 67018) catchment in reference period and at 3°C warming level.

**Figure S2a.** Percentage change in mean, median, Q25 and Q75 nonstationary return levels for 10-year return period across different warming levels, seasons and characteristics.

**Figure S2b.** Percentage change in mean, median, Q25 and Q75 nonstationary return levels for 100-year return period across different warming levels, seasons and characteristics.

**Figure S2c.** Percentage change in mean, median, Q25 and Q75 nonstationary return levels for 500-year return period across different warming levels, seasons and characteristics.

**Figure S3a.** Percentage change in mean stationary return levels for 10-year return period across different warming levels, seasons and characteristics.

**Figure S3b.** Percentage change in mean stationary return levels for 100-year return period across different warming levels, seasons and characteristics.

**Figure S3c.** Percentage change in mean stationary return levels for 500-year return period across different warming levels, seasons and characteristics.

**Figure S4a** Difference in percentage change in mean and Q25 nonstationary and stationary return levels for different drought characteristics at 1.5°C warming level.

**Figure S4b** Difference in percentage change in median and Q75 nonstationary and stationary return levels for different drought characteristics at 1.5°C warming level.

**Figure S4c** Difference in percentage change in mean and Q25 nonstationary and stationary return levels for different drought characteristics at 2°C warming level.

**Figure S4d** Difference in percentage change in median and Q75 nonstationary and stationary return levels for different drought characteristics at 2°C warming level.

**Figure S4e** Difference in percentage change in mean and Q25 nonstationary and stationary return levels for different drought characteristics at 3°C warming level.

**Figure S4f** Difference in percentage change in median and Q75 nonstationary and stationary return levels for different drought characteristics at 3°C warming level.

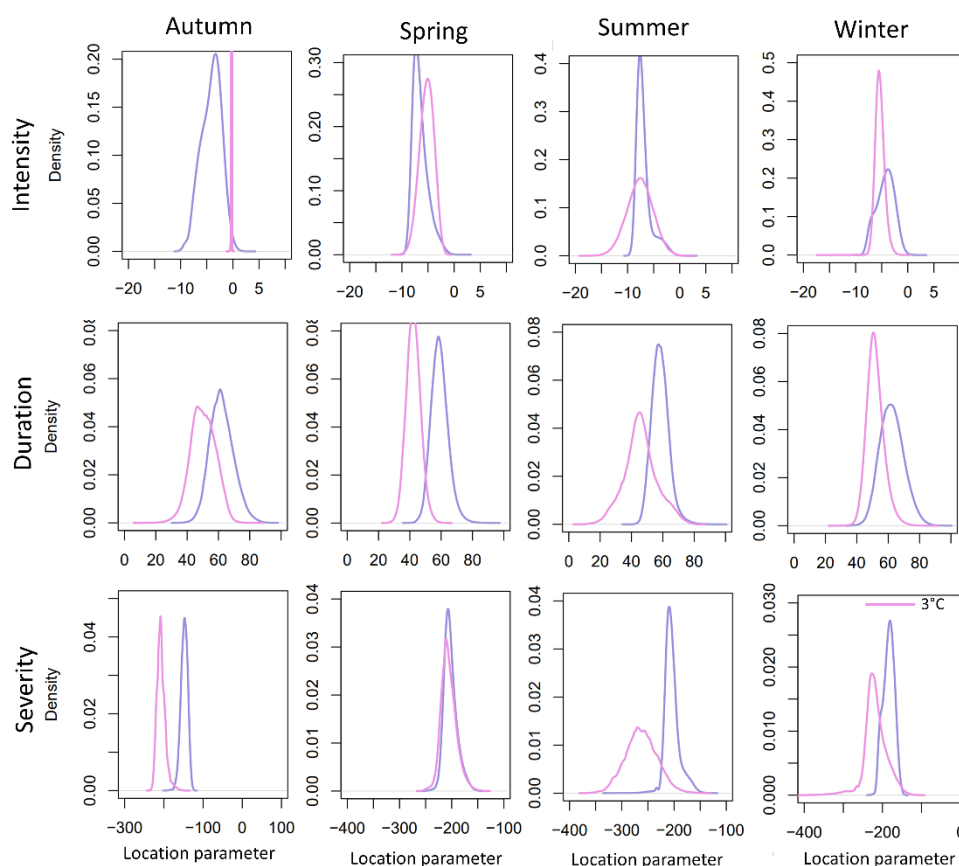

**Figure S1.** Posterior distribution of parameters for different drought characteristics for a sample (Dee in Scotland, NRFA ID: 67018) catchment in reference period and at 3°C warming level.

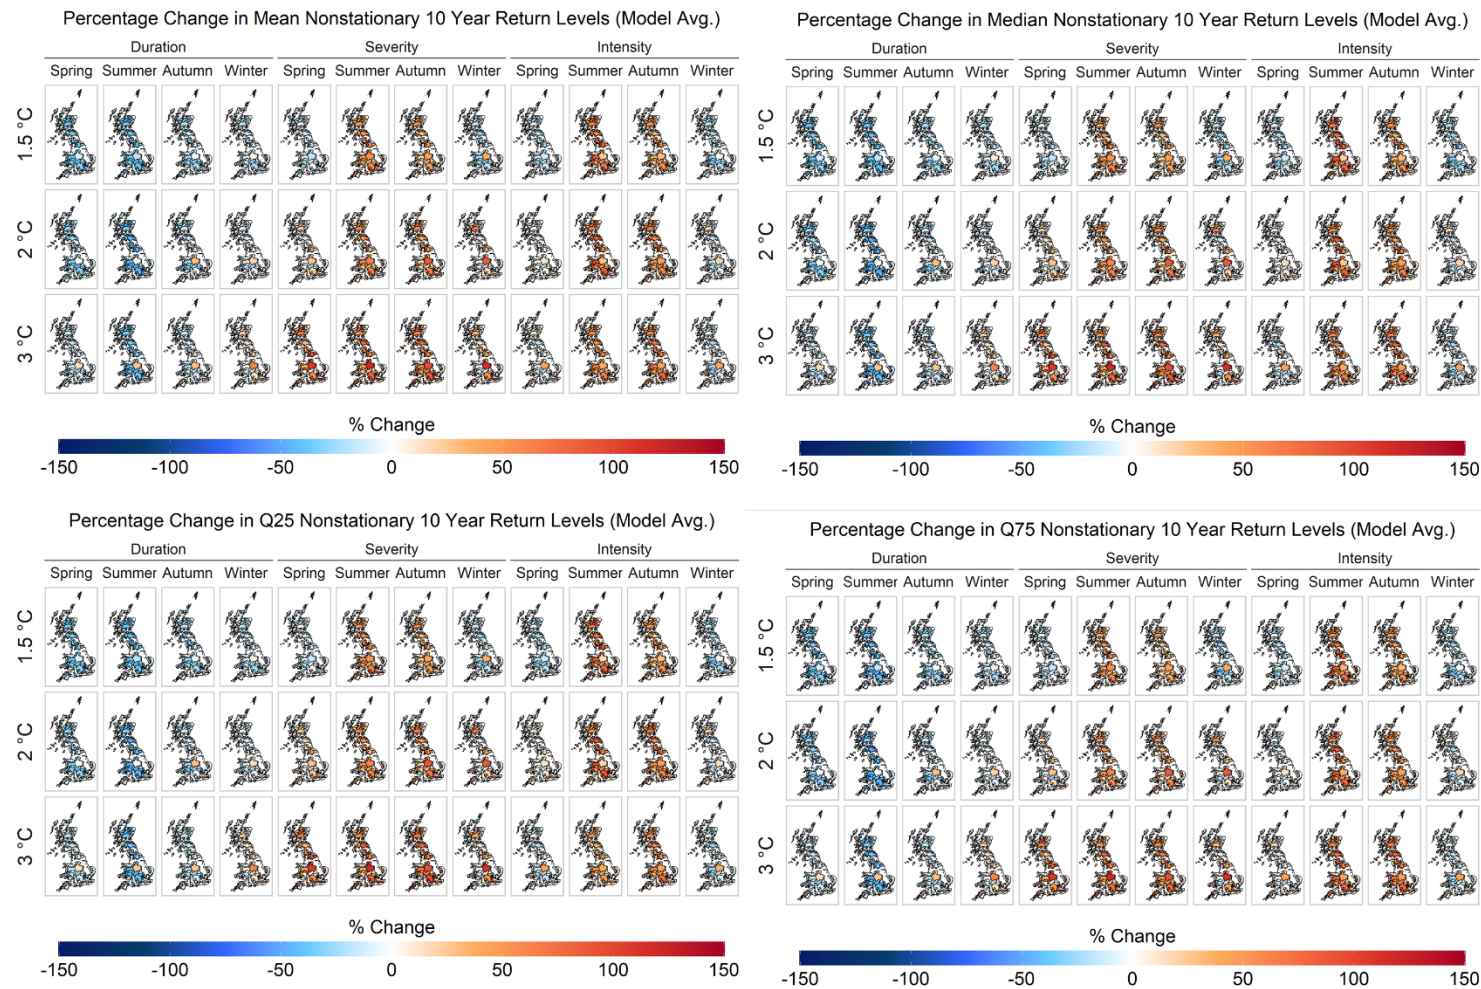

**Figure S2a.** Percentage change in mean, median, Q25 and Q75 nonstationary return levels for 10-year return period across different warming levels, seasons and characteristics.

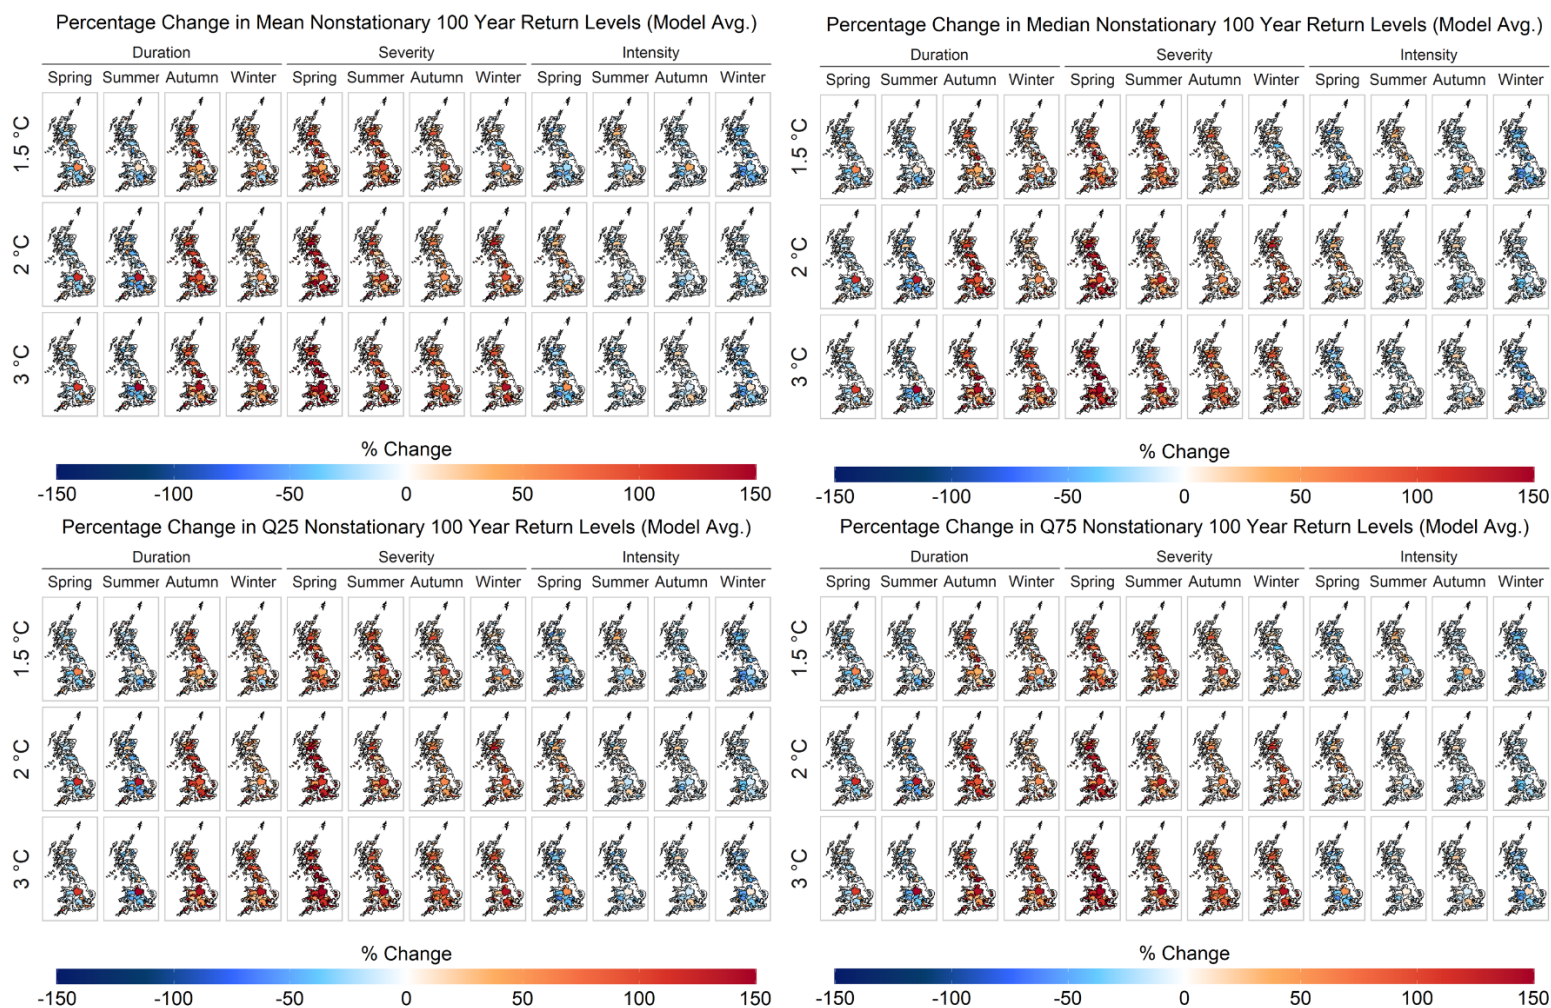

**Figure S2b.** Percentage change in mean, median, Q25 and Q75 nonstationary return levels for 100-year return period across different warming levels, seasons and characteristics.



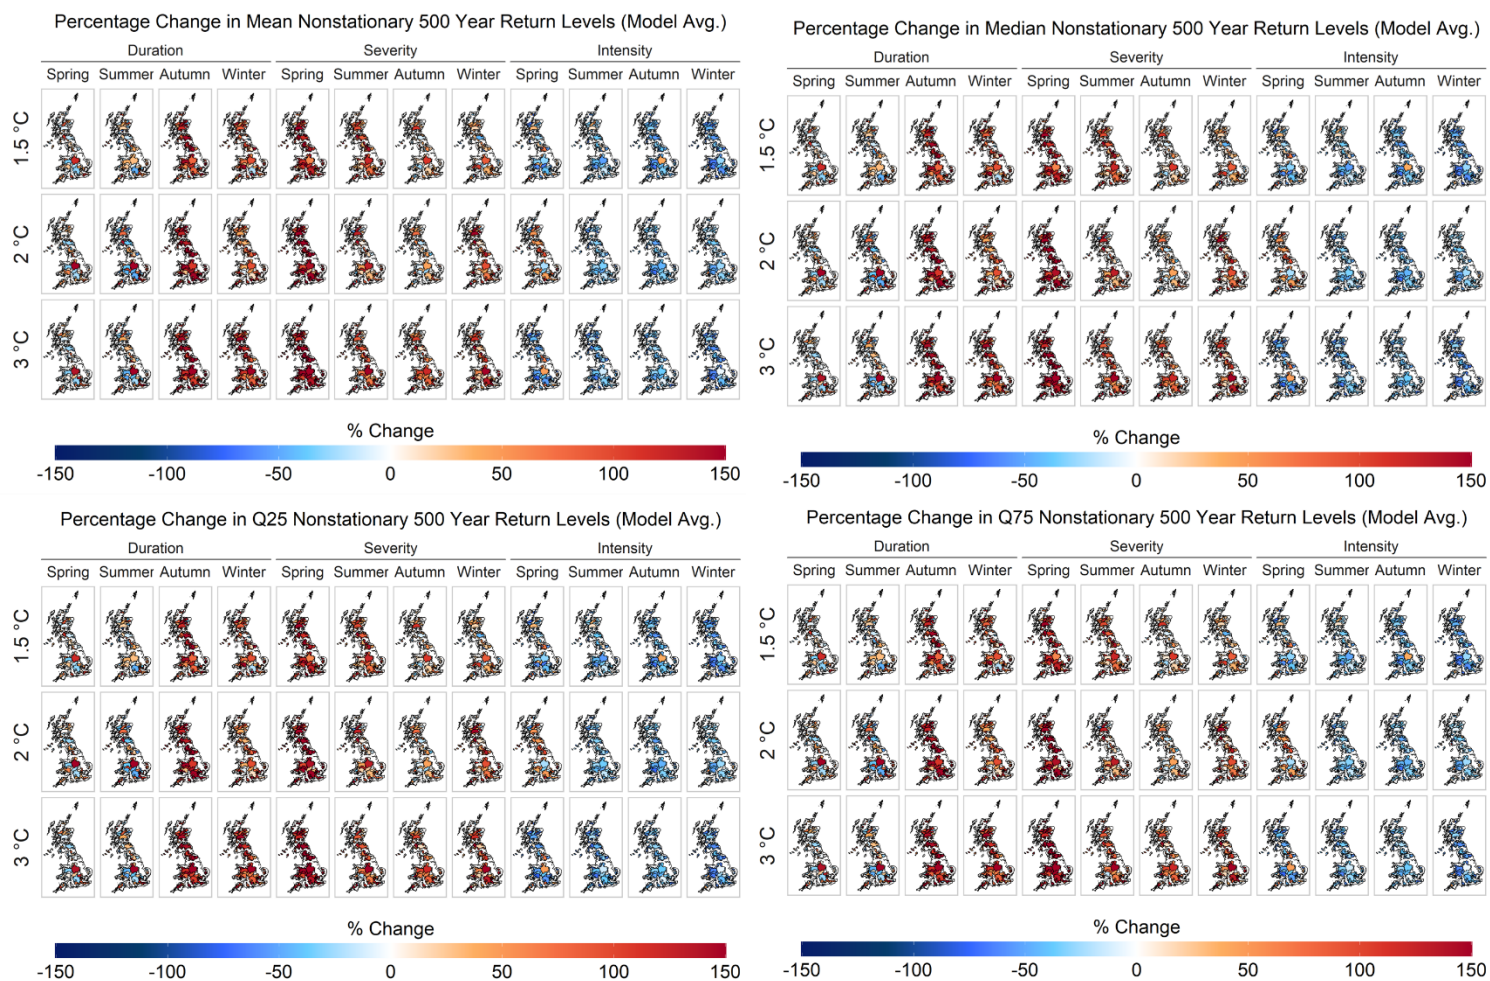

**Figure S2c.** Percentage change in mean, median, Q25 and Q75 nonstationary return levels for 500-year return period across different warming levels, seasons and characteristics.

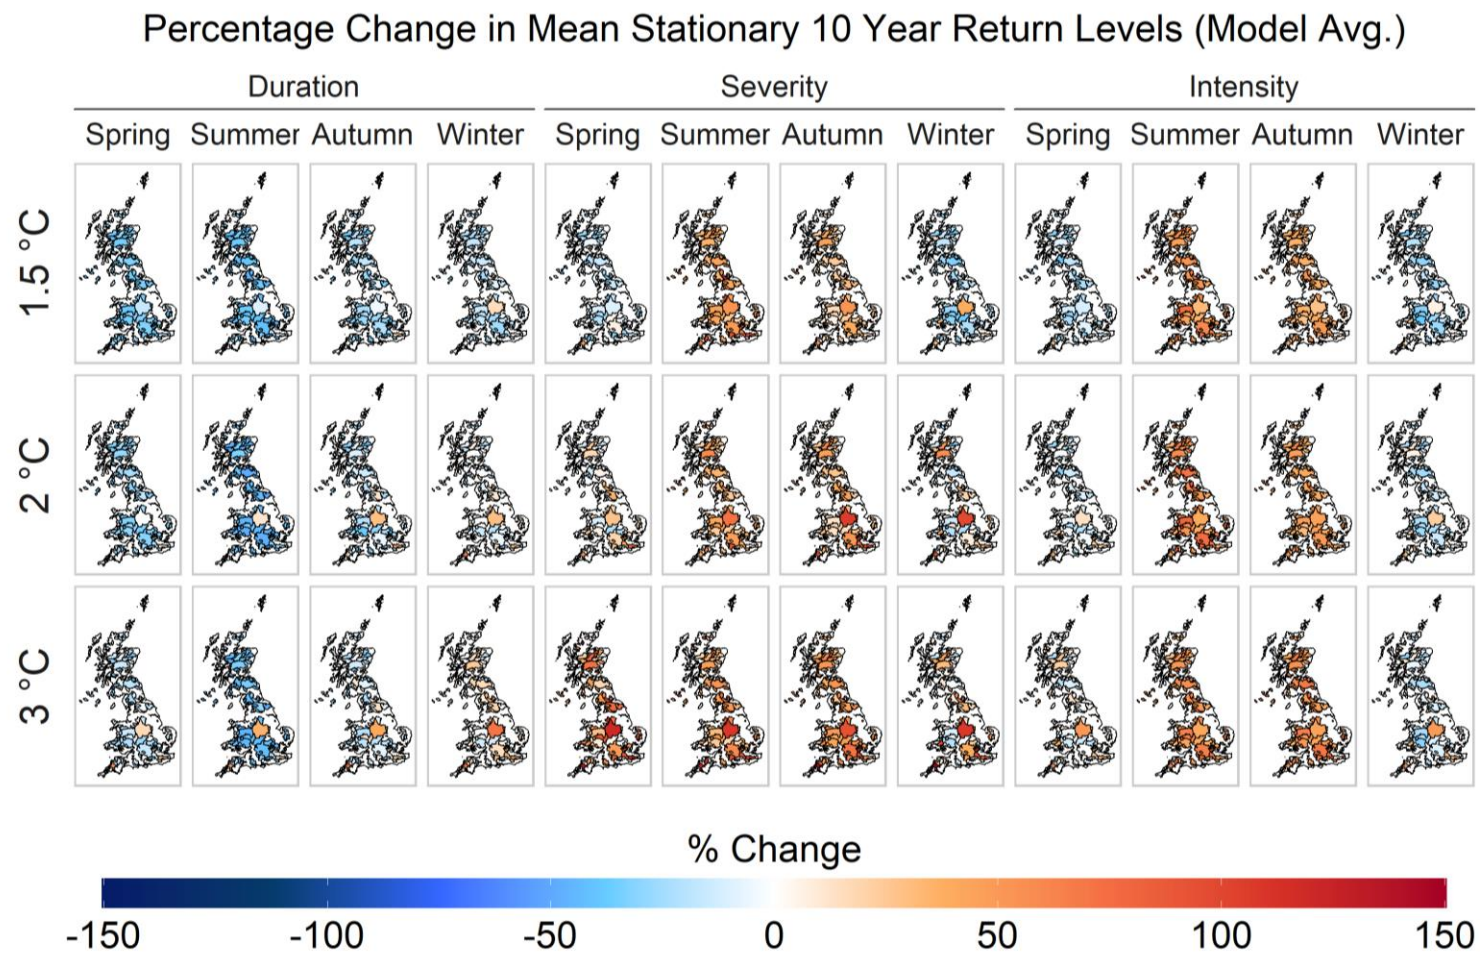

**Figure S3a.** Percentage change in mean stationary return levels for 10-year return period across different warming levels, seasons and characteristics.

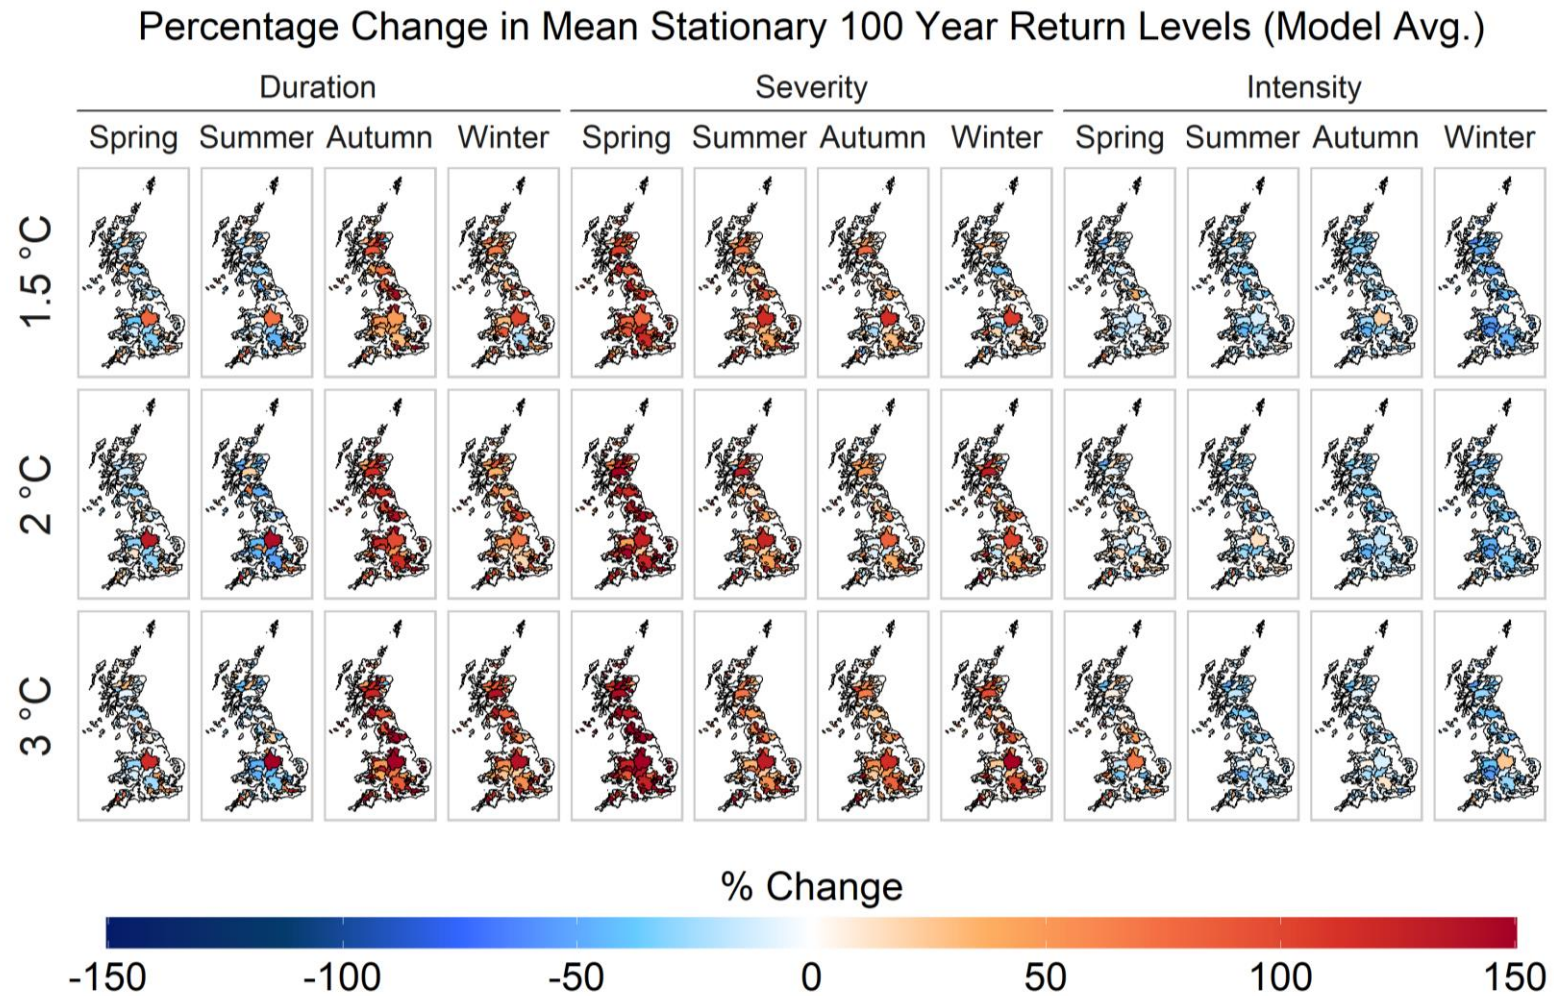

**Figure S3b.** Percentage change in mean stationary return levels for 100-year return period across different warming levels, seasons and characteristics.



# Percentage Change in Mean Stationary 500 Year Return Levels (Model Avg.)

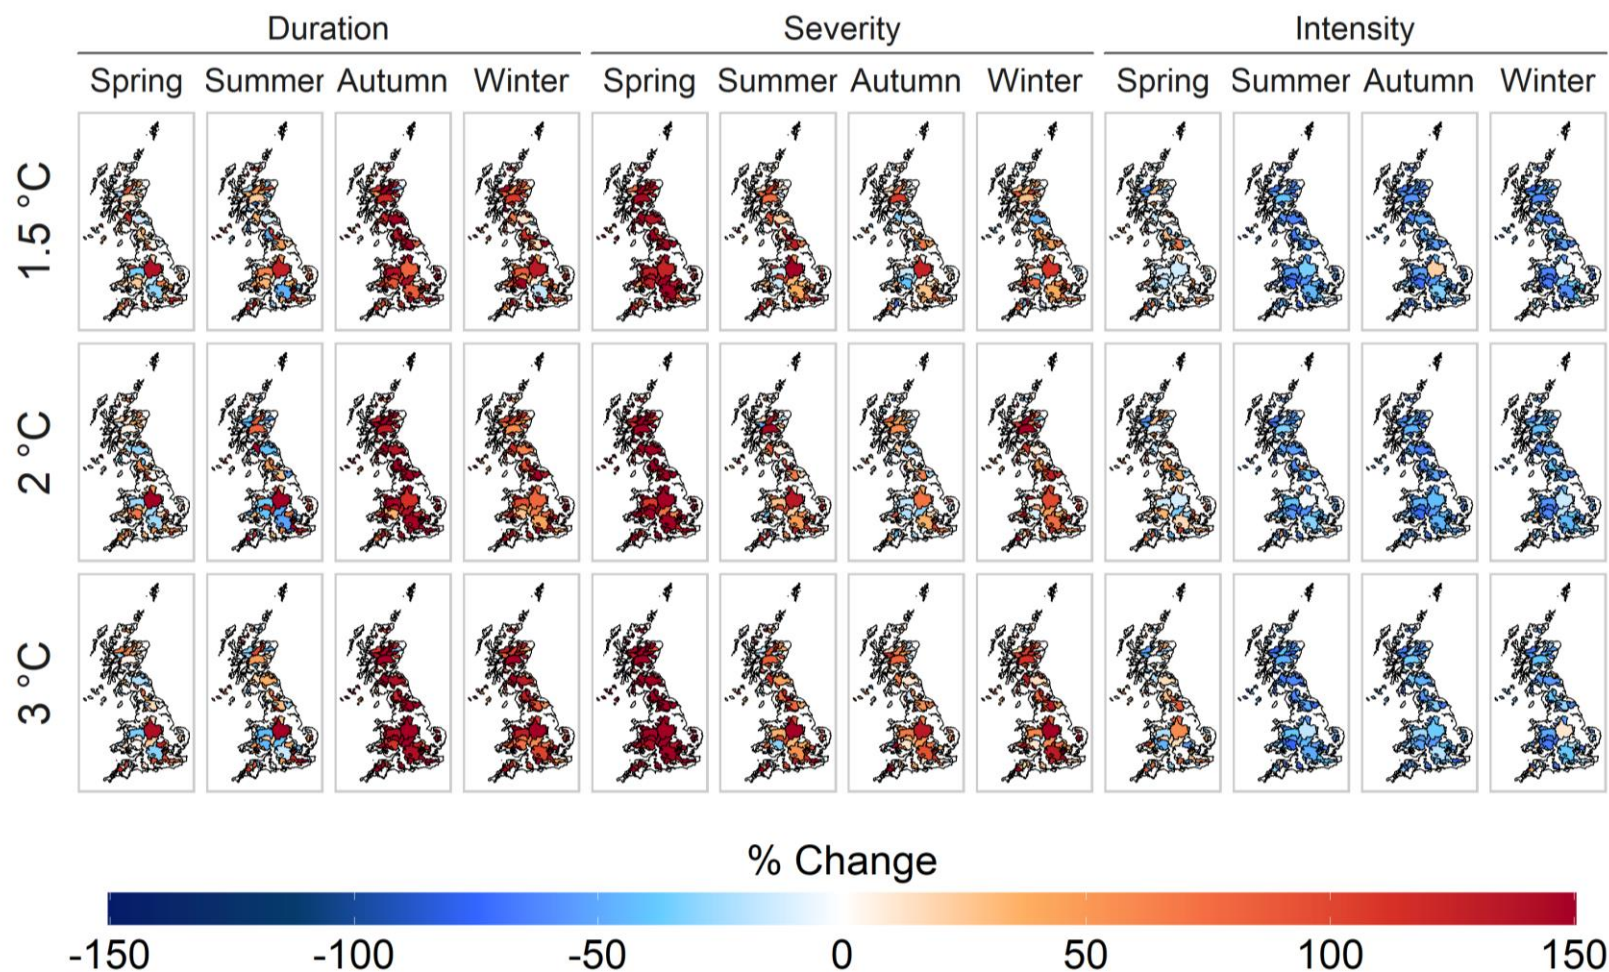

**Figure S3c.** Percentage change in mean stationary return levels for 500-year return period across different warming levels, seasons and characteristics



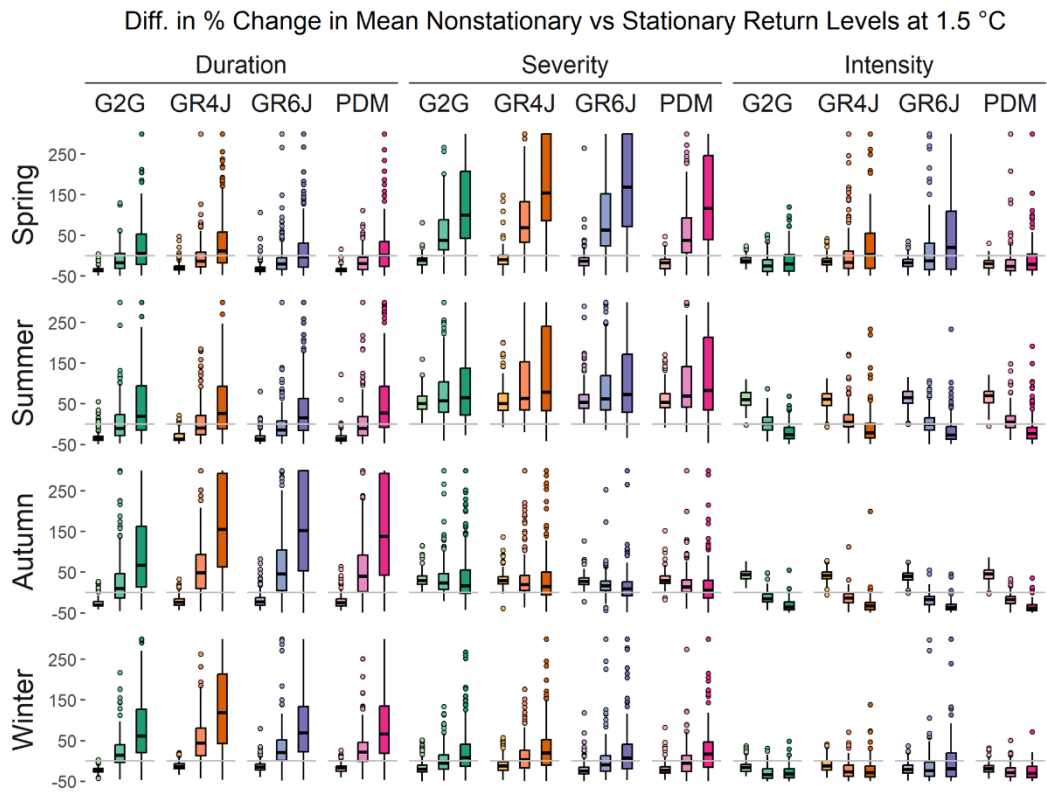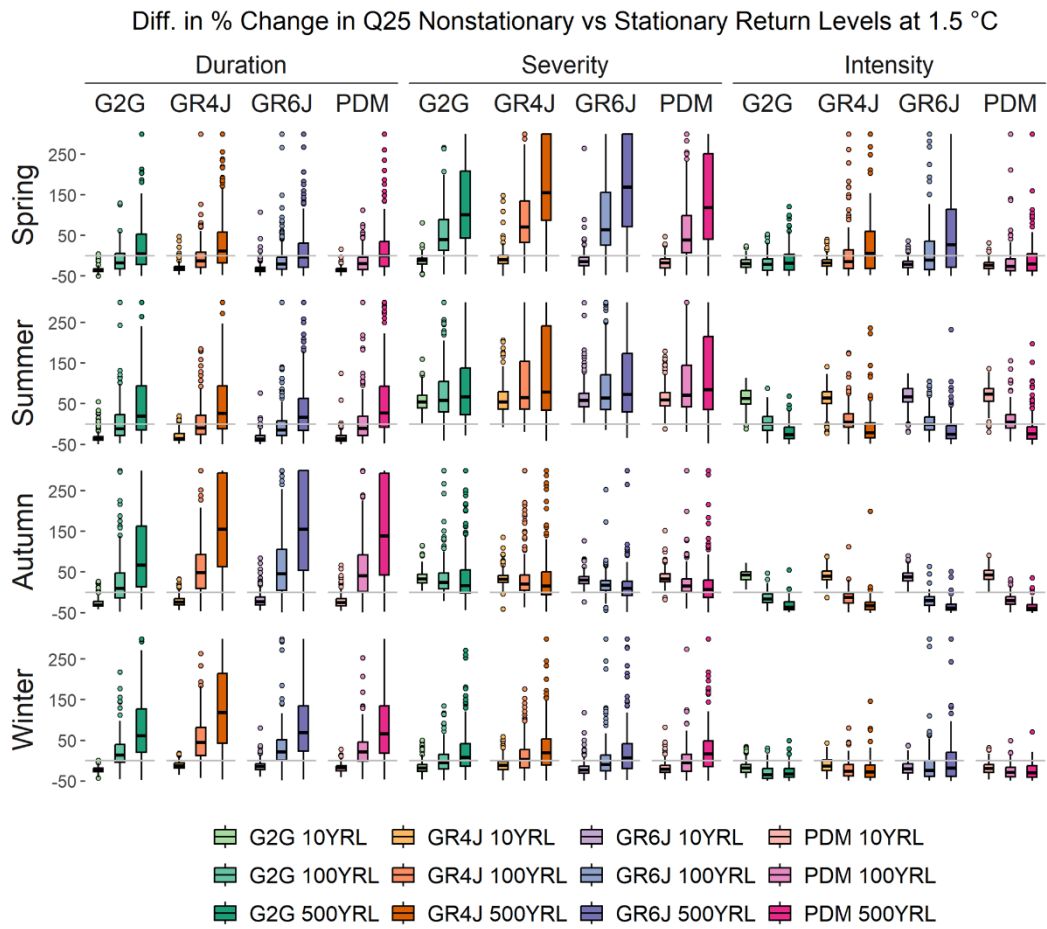

**Figure S4a** Difference in percentage change in mean and Q25 nonstationary and stationary return levels for different drought characteristics at 1.5°C warming level.

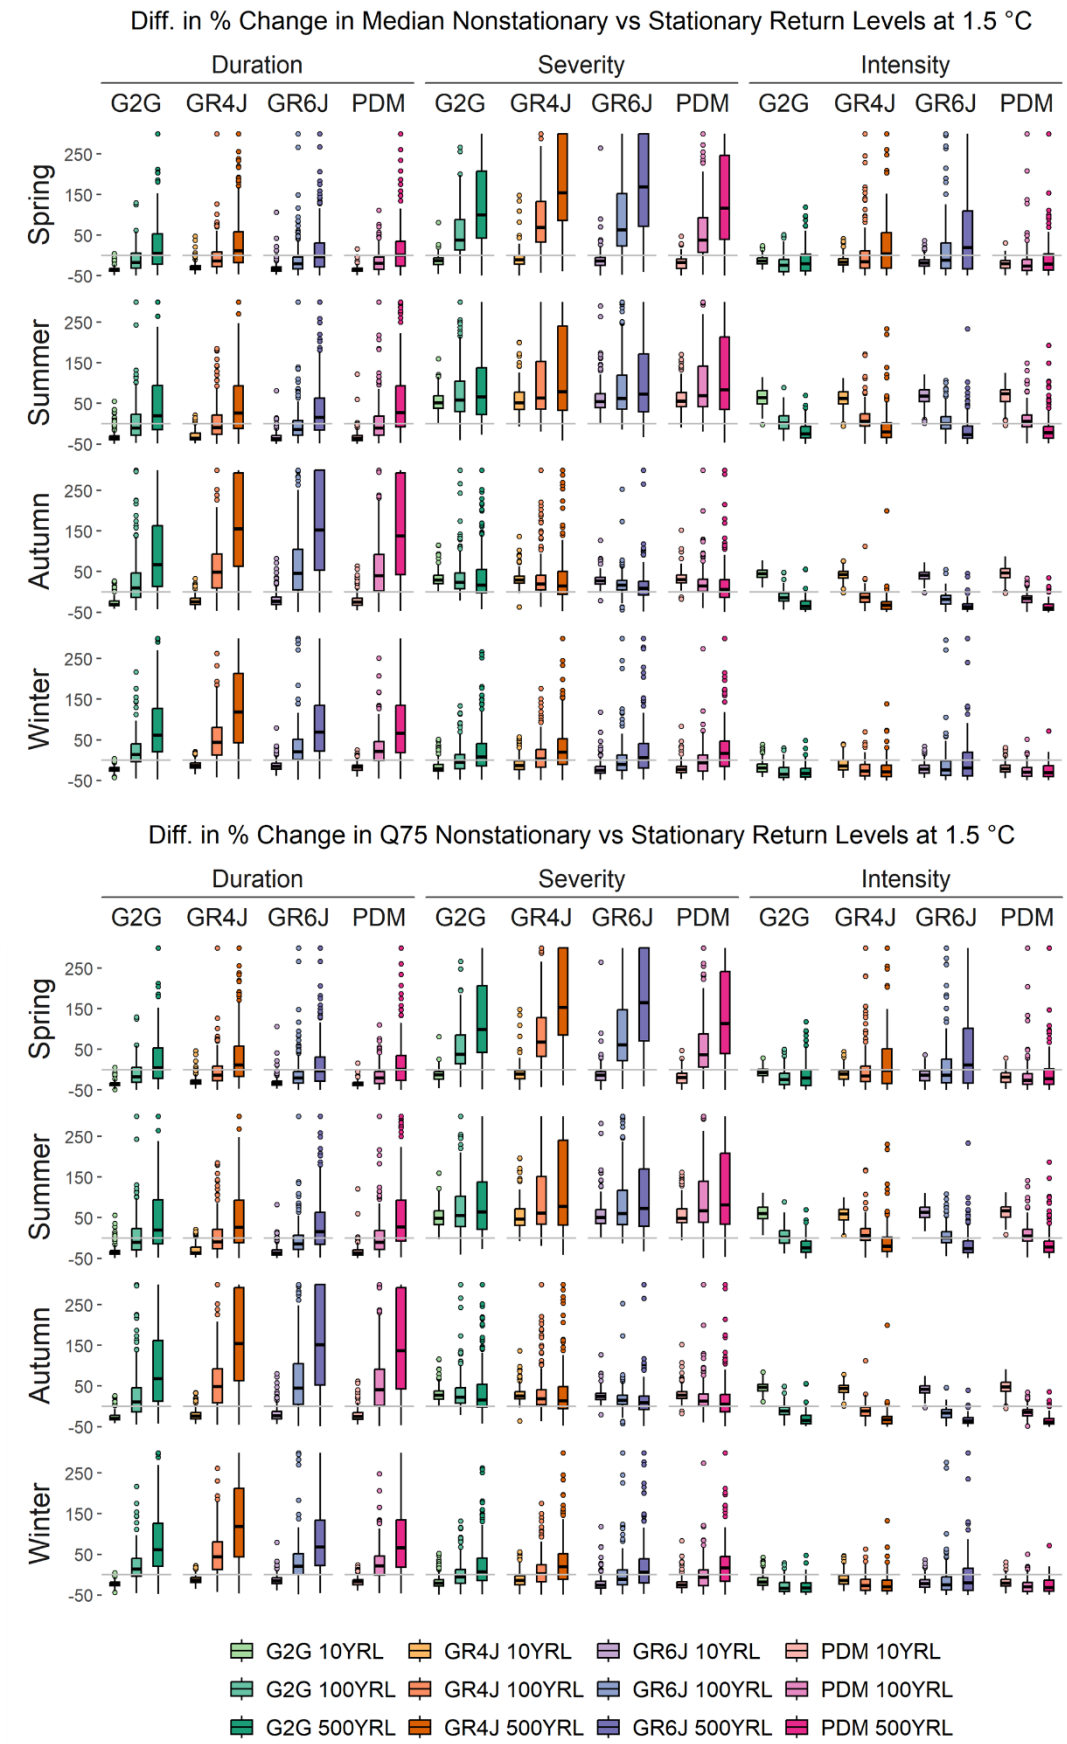

**Figure S4b** Difference in percentage change in median and Q75 nonstationary and stationary return levels for different drought characteristics at 1.5°C warming level.

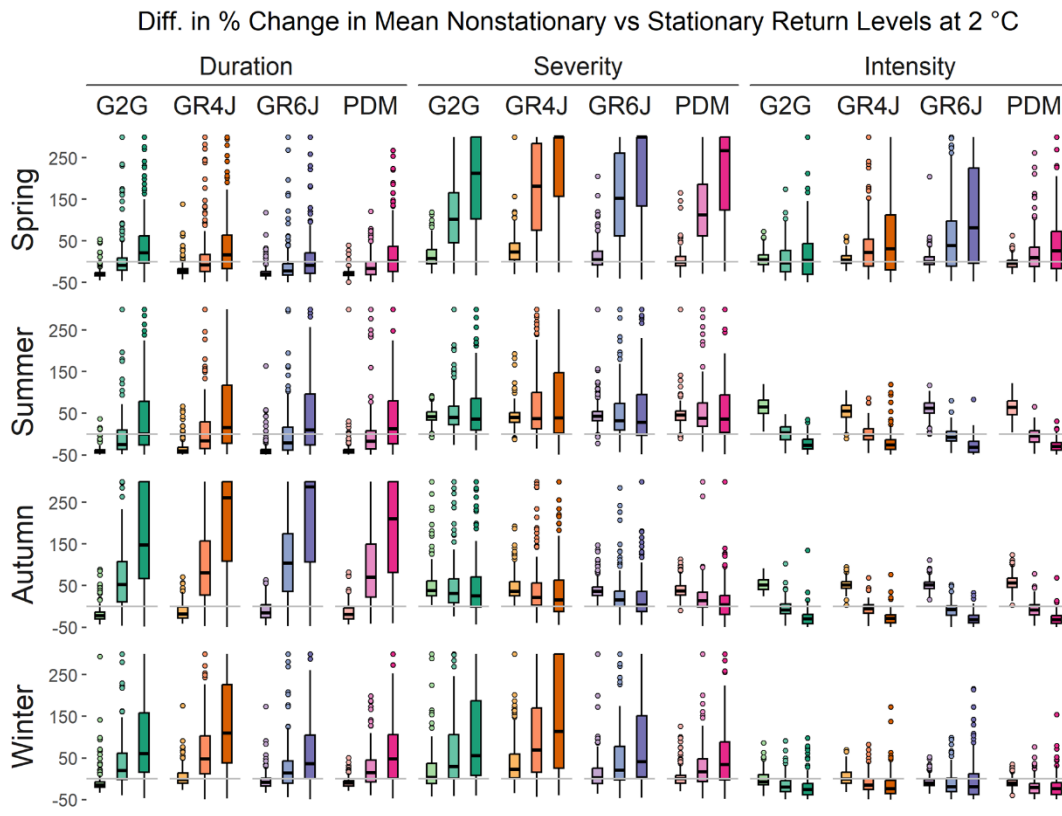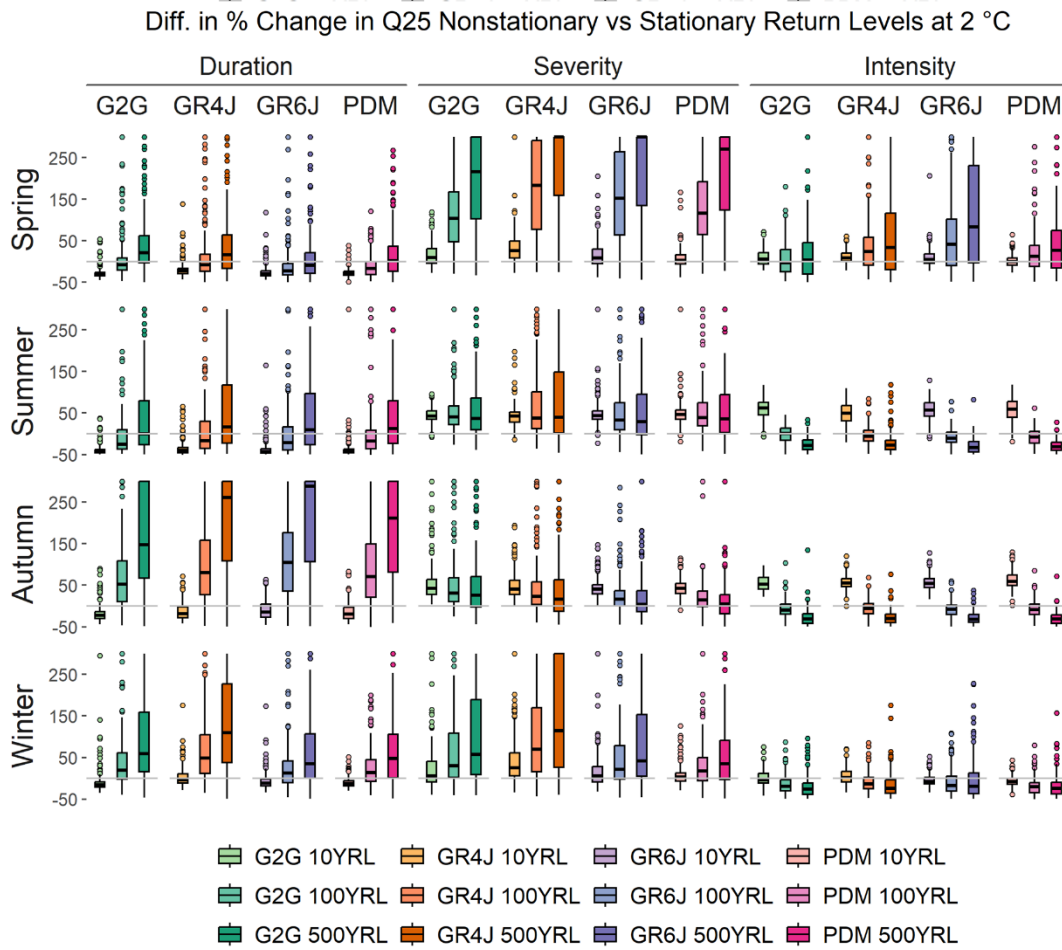

**Figure S4c** Difference in percentage change in mean and Q25 nonstationary and stationary return levels for different drought characteristics at 2°C warming level.



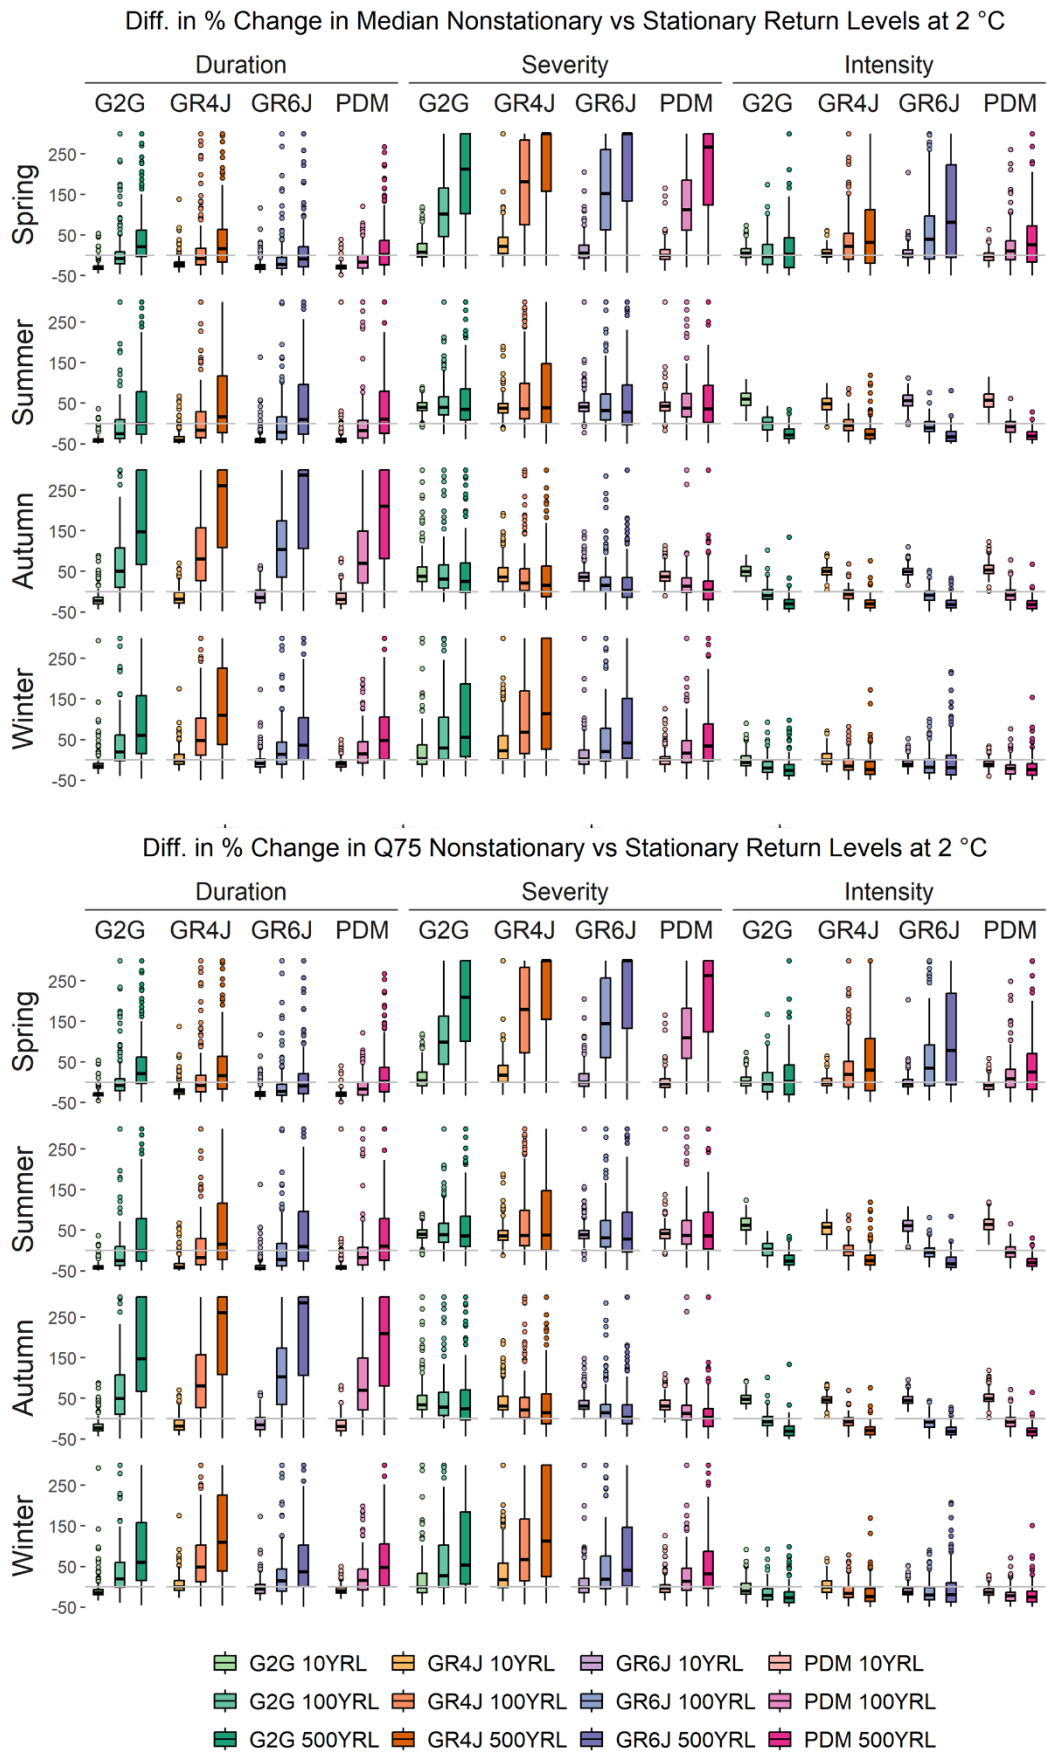

**Figure S4d** Difference in percentage change in median and Q75 nonstationary and stationary return levels for different drought characteristics at 2°C warming level.

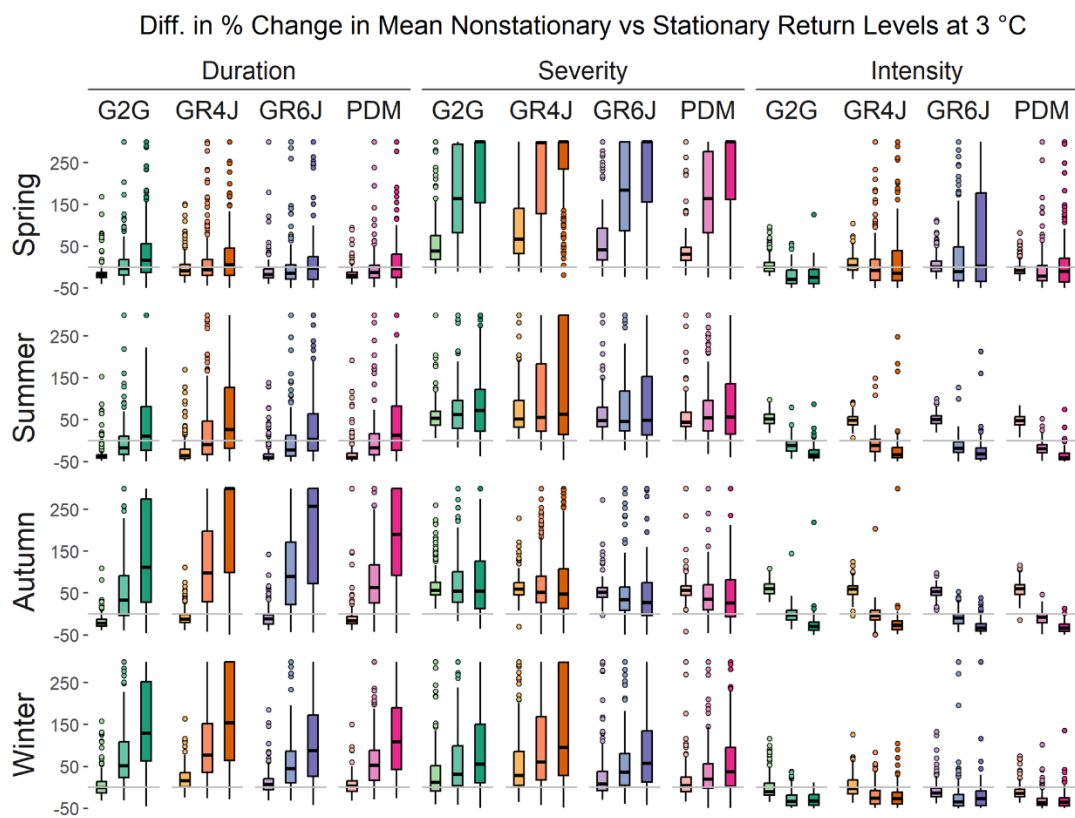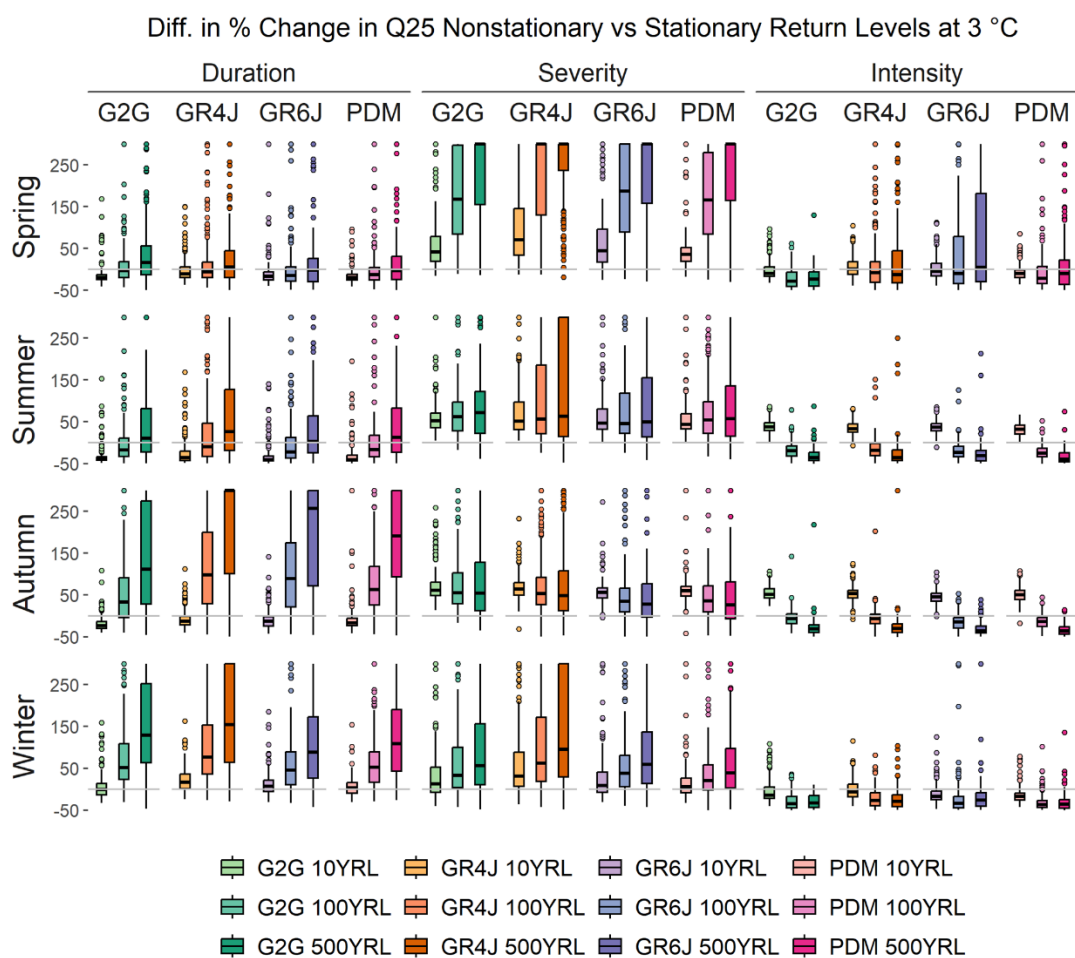

**Figure S4e** Difference in percentage change in mean and Q25 nonstationary and stationary return levels for different drought characteristics at 3°C warming level.

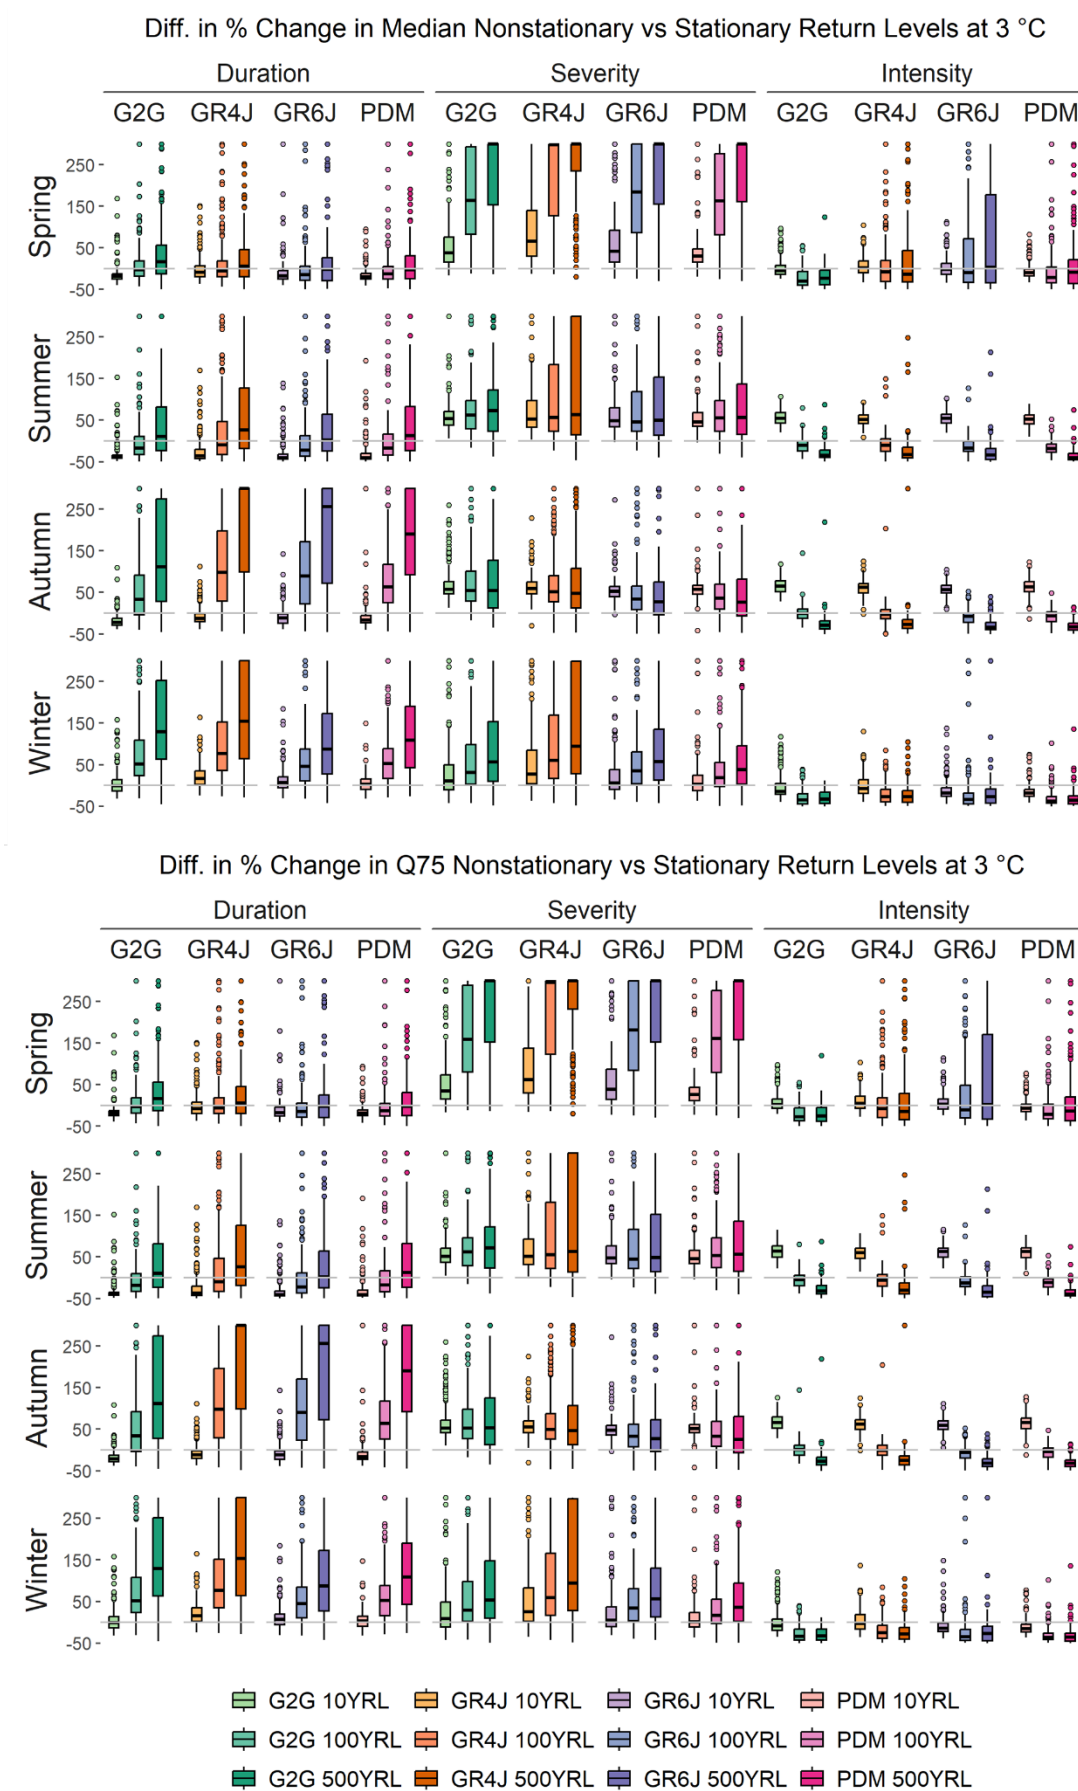

**Figure S4f** Difference in percentage change in median and Q75 nonstationary and stationary return levels for different drought characteristics at 3°C warming level.
